# Supplementary material
Source: PubMed Central journal article supplement (PMC9972892)
Supplement: NIHMS1870055-supplement-Supp3.pdf [file NIHMS1870055-supplement-Supp3.pdf]

1 **SUPPLEMENTARY TABLES**

2  
3 **Supplementary Table 1. PTOA severity scoring guidelines, as published previously(1, 2)**

| Feature                              | 0                | 1                                                                            | 2                                                                                 | 3                                                                             | 4                                                        | 5                                                              | 6                                                          | 7                                                                      |
|--------------------------------------|------------------|------------------------------------------------------------------------------|-----------------------------------------------------------------------------------|-------------------------------------------------------------------------------|----------------------------------------------------------|----------------------------------------------------------------|------------------------------------------------------------|------------------------------------------------------------------------|
| <b>Structural Damage (0-7)</b>       | Normal Cartilage | Roughened surface with small fibrillations                                   | Fibrillations immediately below superficial layer or some loss of laminal surface | Horizontal cracks or separations between calcified and noncalcified cartilage | Mild loss of non-calcified cartilage (<10% surface area) | Moderate loss of non-calcified cartilage (10-50% surface area) | Severe loss of non-calcified cartilage (>50% surface area) | Erosion of cartilage to subchondral bone (any percent of surface area) |
| <b>Proteoglycan Loss (0-3)</b>       | Normal cartilage | Decreased but not complete loss of Safo staining in non-calcified area       | Focal loss of Safo staining in non-calcified cartilage (<30% surface area)        | Diffuse loss of Safo staining in non-calcified cartilage (>30% surface area)  |                                                          |                                                                |                                                            |                                                                        |
| <b>Chondrocyte Hypertrophy (0-1)</b> | None             | Enlarged chondrocyte lacunae with lack of Safo stain around a collapsed cell |                                                                                   |                                                                               |                                                          |                                                                |                                                            |                                                                        |
| <b>Osteophyte Size (0-3)</b>         | None             | Small- same thickness as adjacent cartilage                                  | Medium- 1 to 3 times thick as adjacent cartilage                                  | Large- >3 times thicker than adjacent cartilage                               |                                                          |                                                                |                                                            |                                                                        |
| <b>Osteophyte Maturity (0-3)</b>     | None             | Predominately cartilage                                                      | Mixed cartilage and bone with vascular invasion                                   | Predominately bone                                                            |                                                          |                                                                |                                                            |                                                                        |
| <b>SCB Thickening (0-3)</b>          | Normal cartilage | Mild thickening, <50% increase                                               | Moderate thickening, 50-100% increase                                             | Severe thickening, >100% increase                                             |                                                          |                                                                |                                                            |                                                                        |

5 **Supplementary Table 2. Synovitis scoring guidelines, as published previously(2, 3), with the addition of a fibrosis**  
 6 **criterion**

| Feature                     | Description                                                                                                                                                                                                                                            | 0                                                       | 1                                                                                             | 2                                                                                                                                 | 3                                                                                                                                                     |
|-----------------------------|--------------------------------------------------------------------------------------------------------------------------------------------------------------------------------------------------------------------------------------------------------|---------------------------------------------------------|-----------------------------------------------------------------------------------------------|-----------------------------------------------------------------------------------------------------------------------------------|-------------------------------------------------------------------------------------------------------------------------------------------------------|
| Pannus                      | Defined as fibrous tissue/synovium/ inflammatory cell outgrowth spreading over the surface of the bone and/or cartilage at the joint margins.                                                                                                          | No pannus                                               | Mild: Pannus has migrated on bone but not encroaching on cartilage.                           | Moderate: Pannus has migrated < 1x cartilage depth.                                                                               | Severe: Pannus has migrated > 1x cartilage depth.                                                                                                     |
| Bone erosion                | Score the margin of the femur at or adjacent to the joint capsule attachment (between joint capsule attachment and cartilage margin – above the junction of the growth plate with the femoral cortex).                                                 | No Cortical Bone Erosion                                | Partial thickness loss of cortical bone only.                                                 | Focal complete loss of cortical bone – communication with marrow cavity at one small “vascular” communication site.               | Widespread complete loss of cortical bone – communication with marrow cavity at multiple sites or broad area loss of cortical bone.                   |
| Synovial lining hyperplasia | Score this superior to the meniscal remnant. Do not score the cells actually attached to the tibia or femur or cells on the surface of the meniscus itself and avoid peri-meniscal plica. Score the maximum hyperplasia seen anywhere along this area. | 1 cell thick                                            | Mild: 2-3 cells thick                                                                         | Moderate: 4-5 cells thick                                                                                                         | Severe: > 6 cells thick                                                                                                                               |
| Sub-synovial inflammation   | Score this superior to the meniscal remnant. The infiltration of inflammatory cells (neutrophils, macrophages and/or lymphocytes) is evaluated.                                                                                                        | No inflammatory cells                                   | Occasional scattered inflammatory cells – or perivascular                                     | Focal areas of dense sub-synovial WBC infiltrate – but still predominantly normal sub-synovial areolar connective tissue present. | Widespread dense sub-synovial WBC infiltrate – markedly reduced or little/no normal areolar connective tissue evident or lymphoid follicle formation. |
| Synovial fibrosis           | Score this as a function of synovial area exhibiting pathological fibrosis, characterized by blue staining of collagen (from FastGreen) and reduction of areolar-like adipocytes in fat pad.                                                           | No fibrosis                                             | Dispersed fibrosis (<10% of synovial area)                                                    | Moderate fibrosis (10-30% of synovial area)                                                                                       | Severe fibrosis (>30% of synovial area)                                                                                                               |
| Synovial exudate            | Infiltration of inflammatory cells (neutrophils, macrophages and/or lymphocytes) in the synovial cavity.                                                                                                                                               | No inflammatory cells or fibrin in the synovial cavity. | Inflammatory cells and/or fibrin clot in the synovial cavity – may be restricted to recesses. |                                                                                                                                   |                                                                                                                                                       |

8 **Supplementary Table 3. Antibodies**

| <b>Antibody name</b>                                       | <b>Raised in</b> | <b>Manufacturer</b>       | <b>RRID</b> | <b>Application (dilution)</b>                        |
|------------------------------------------------------------|------------------|---------------------------|-------------|------------------------------------------------------|
| BV650 anti-mouse CD45<br>Clone 30-F11                      | Rat              | Biologend<br>103151       | AB_2565884  | Flow cytometry,<br>1:400                             |
| PE/Cy7 anti-mouse CD31<br>Clone 390                        | Rat              | Biologend<br>102417       | AB_830756   | Flow cytometry,<br>1:200                             |
| FITC anti-mouse Podoplanin<br>Clone 8.1.1                  | Syrian Hamster   | Biologend<br>127416       | AB_2629802  | Flow cytometry,<br>1:100                             |
| PE/Dazzle594 anti-mouse CD90.2<br>Clone 30-H12             | Rat              | Biologend<br>105340       | AB_2632887  | Flow cytometry,<br>1:200                             |
| PE/Cy7 anti-mouse CD55<br>Clone RIKO-3                     | Armenian Hamster | Biologend<br>131814       | AB_2800634  | Flow cytometry,<br>1:100                             |
| BV605 anti-mouse CD11b<br>Clone M1/70                      | Rat              | Biologend<br>101237       | AB_11126744 | Flow cytometry,<br>1:400                             |
| TruStain FcX PLUS<br>(anti-mouse CD16/32)<br>Clone S17011E | Rat              | Biologend<br>156604       | AB_2783138  | Flow cytometry,<br>1:1000                            |
| Anti-mouse R-spondin 2<br>Polyclonal                       | Rabbit           | ProteinTech<br>17781-1-AP | AB_2269700  | Flow cytometry,<br>2 µg/sample;<br>IHC/ICC,<br>1:250 |
| Rabbit IgG Isotype Control<br>Polyclonal                   | Rabbit           | Abcam<br>ab171870         | AB_2687657  | Flow cytometry,<br>2 µg/sample                       |
| BV421 anti-rabbit IgG secondary<br>Polyclonal              | Donkey           | Biologend<br>406410       | AB_10897810 | Flow cytometry,<br>1:100                             |
| AlexaFluor488 anti-rabbit IgG secondary<br>Polyclonal      | Goat             | Invitrogen<br>A-11008     | AB_143165   | IHC/ICC,<br>1:500                                    |
| Non-phospho β-Catenin (Ser33/37/Thr41)<br>Clone D13A1      | Rabbit           | Cell Signaling<br>8814    | AB_11127203 | ICC,<br>1:1600                                       |
| AlexaFluor488 anti-rabbit IgG secondary<br>Polyclonal      | Goat             | Invitrogen<br>A-11034     | AB_2576217  | ICC,<br>1:500                                        |
| Normal Rabbit IgG Isotype Control<br>Polyclonal            | Rabbit           | Santa Cruz<br>sc-2027     | AB_737197   | ICC,<br>1:1600                                       |

9

10 **Supplementary Table 4. Primers**

| <b>Gene name</b>      | <b>5' – 3' sequence</b> | <b>Organism</b>     |
|-----------------------|-------------------------|---------------------|
| <i>Acan</i> Fwd       | CCTGCTACTTCATCGACCCC    | <i>Mus musculus</i> |
| <i>Acan</i> Rev       | AGATGCTGTTGACTCGAACCT   | <i>Mus musculus</i> |
| <i>Arg1</i> Fwd       | ATCGTGTACATTGGCTTGCG    | <i>Mus musculus</i> |
| <i>Arg1</i> Rev       | GGCCTTTTCTTCCTTCCCAG    | <i>Mus musculus</i> |
| <i>Atp5b</i> Fwd      | CTGGATTCAGGGGCACCAAT    | <i>Mus musculus</i> |
| <i>Atp5b</i> Rev      | GCACCTCCAAGAGTCCGAT     | <i>Mus musculus</i> |
| <i>Axin2</i> Fwd      | GCGCTTTGATAAGGTCCTGG    | <i>Mus musculus</i> |
| <i>Axin2</i> Rev      | TCATGTGAGCCTCCTCTCTTT   | <i>Mus musculus</i> |
| <i>Bsp/lbsp</i> Fwd   | TTCGTTTGAAGTCTCCTCTTCC  | <i>Mus musculus</i> |
| <i>Bsp/lbsp</i> Rev   | CTCCTCTGAAACGGTTTCCA    | <i>Mus musculus</i> |
| <i>Col2a1</i> Fwd     | ACTTGCCAAGACCTGAAACTCTG | <i>Mus musculus</i> |
| <i>Col2a1</i> Rev     | AAACTTTTCATGGCGTCCAAGG  | <i>Mus musculus</i> |
| <i>Col10a1</i> Fwd    | TCTCCCAGCACCAGAATCTATC  | <i>Mus musculus</i> |
| <i>Col10a1</i> Rev    | CTTTATGCCTGTGGGCGTTT    | <i>Mus musculus</i> |
| <i>Gapdh</i> Fwd      | GCCTCTCTTGCTCAGTGCC     | <i>Mus musculus</i> |
| <i>Gapdh</i> Rev      | CTCCACTCTTCCACCTTCG     | <i>Mus musculus</i> |
| <i>Il10</i> Fwd       | GCGCTGTCATCGATTTCTCC    | <i>Mus musculus</i> |
| <i>Il10</i> Rev       | ATGGCCTTGTAGACACCTTGG   | <i>Mus musculus</i> |
| <i>Il1b</i> Fwd       | TGCCACCTTTTGACAGTGATG   | <i>Mus musculus</i> |
| <i>Il1b</i> Rev       | AAGGTCCACGGGAAAGACAC    | <i>Mus musculus</i> |
| <i>Il6</i> Fwd        | GCCTTCTTGGGACTGATGCT    | <i>Mus musculus</i> |
| <i>Il6</i> Rev        | TGCCATTGCACAACCTCTTTTCT | <i>Mus musculus</i> |
| <i>Lef1</i> Fwd       | AAGAAATGAGAGCGAATGTCGT  | <i>Mus musculus</i> |
| <i>Lef1</i> Rev       | TTCTGGGACCTGTACCTGAAGT  | <i>Mus musculus</i> |
| <i>Lgr4</i> Fwd       | GCTGCGGACTCTGGACTTAT    | <i>Mus musculus</i> |
| <i>Lgr4</i> Rev       | TGTCCCAAGCTTCGCAAAG     | <i>Mus musculus</i> |
| <i>Lgr5</i> Fwd       | ATCAGGTCAATACCGGAGCG    | <i>Mus musculus</i> |
| <i>Lgr5</i> Rev       | GGCACCATTCAAAGTCAGTGT   | <i>Mus musculus</i> |
| <i>Lgr6</i> Fwd       | GGCATCATGCTGTCCGC       | <i>Mus musculus</i> |
| <i>Lgr6</i> Rev       | GGTTGTTCACTAGAGGTCTAGGT | <i>Mus musculus</i> |
| <i>Mrc1/Cd206</i> Fwd | GGCTGATTACGAGCAGTGGA    | <i>Mus musculus</i> |
| <i>Mrc1/Cd206</i> Rev | ATGCCAGGGTCACCTTTCAG    | <i>Mus musculus</i> |
| <i>Nos2</i> Fwd       | AGAGAACGGAGAACGTTGGA    | <i>Mus musculus</i> |
| <i>Nos2</i> Rev       | GGATTCTGGAACATTCTGTGCTG | <i>Mus musculus</i> |
| <i>Ocn/Bglap</i> Fwd  | CAGACACCATGAGGACCATCTT  | <i>Mus musculus</i> |
| <i>Ocn/Bglap</i> Rev  | GATAGCTCGTCAACAAGCAGG   | <i>Mus musculus</i> |
| <i>Osx/Sp7</i> Fwd    | TTCCCCAGGGTTGTTGAGTC    | <i>Mus musculus</i> |
| <i>Osx/Sp7</i> Rev    | ATGGCGTCTCTCTGCTTGA     | <i>Mus musculus</i> |
| <i>Rspo2</i> Fwd      | ACGTGTAGCAGAAACAACCG    | <i>Mus musculus</i> |
| <i>Rspo2</i> Rev      | GCTTCCGCCTCTTCTTCTTG    | <i>Mus musculus</i> |
| <i>Runx2</i> Fwd      | CCCAGCCACCTTTACCTACA    | <i>Mus musculus</i> |
| <i>Runx2</i> Rev      | TATGGAGTGCTGCTGGTCTG    | <i>Mus musculus</i> |
| <i>Sox5</i> Fwd       | AGCACAACACAATGGAAGTCG   | <i>Mus musculus</i> |
| <i>Sox5</i> Rev       | TTCAGGGTGTCCACCACATC    | <i>Mus musculus</i> |
| <i>Tnf</i> Fwd        | ATGGCCTCCCTCTCATCAGT    | <i>Mus musculus</i> |
| <i>Tnf</i> Rev        | TGTTTTGCTACGACGTGGG     | <i>Mus musculus</i> |

12 **REFERENCES**

- 13 1. Little CB, Barai A, Burkhardt D, Smith SM, Fosang AJ, Werb Z, et al. Matrix metalloproteinase 13-deficient mice  
14 are resistant to osteoarthritic cartilage erosion but not chondrocyte hypertrophy or osteophyte development. *Arthritis*  
15 *Rheum.* 2009;60(12):3723-33.
- 16 2. Rzeczycki P, Rasner C, Lammlin L, Junginger L, Goldman S, Bergman R, et al. Cannabinoid receptor type 2 is  
17 upregulated in synovium following joint injury and mediates anti-inflammatory effects in synovial fibroblasts and  
18 macrophages. *Osteoarthr. Cartil.* 2021;29(12):1720-31.
- 19 3. Jackson MT, Moradi B, Zaki S, Smith MM, McCracken S, Smith SM, et al. Depletion of protease-activated  
20 receptor 2 but not protease-activated receptor 1 may confer protection against osteoarthritis in mice through  
21 extracartilaginous mechanisms. *Arthritis Rheum.* 2014;66(12):3337-48.
