# Supplementary material
Source: PubMed Central journal article supplement (PMC9972892)

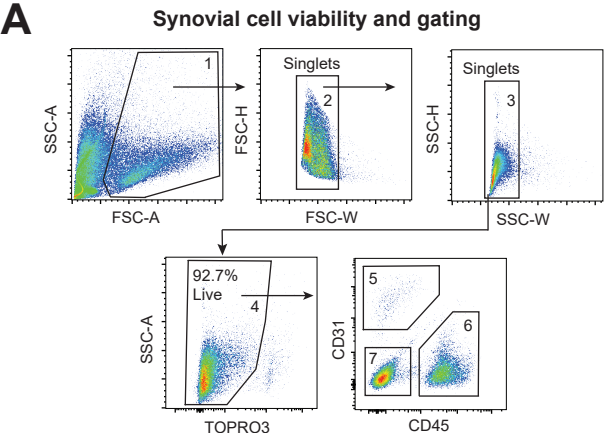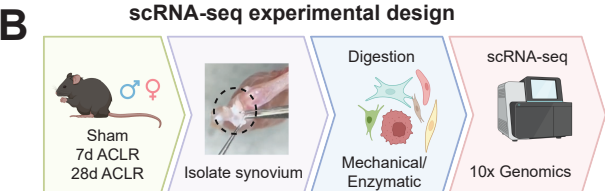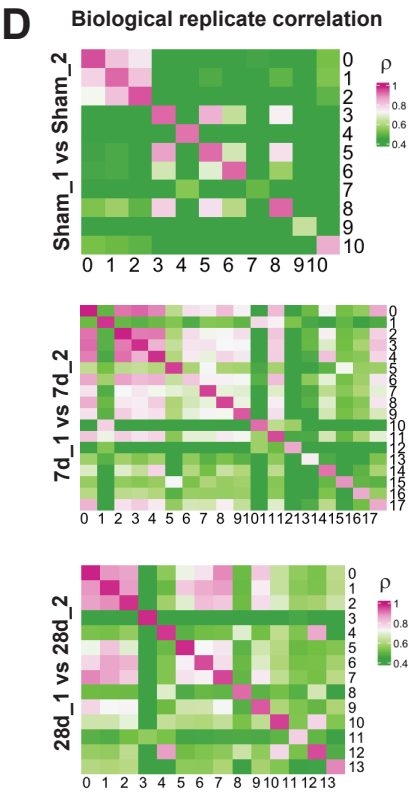

### C scRNA-seq quality control and filtering

| Step                                                                                          | Number of cells | % cells remaining |
|-----------------------------------------------------------------------------------------------|-----------------|-------------------|
| <b>Step 0:</b> Starting number of cells in pre-processed data                                 | 28,277          | 100               |
| <b>Step 1:</b> Load pre-processed data into Seurat min.features = 100                         | 28,023          | 99.1              |
| <b>Step 2:</b> Removal of cells with nFeatures < 200                                          | 27,743          | 98.11             |
| <b>Step 3:</b> Removal of cells with over 5% of genes mitochondrial-derived percent.mt > 0.05 | 20,664          | 73.07             |
| <b>Step 4:</b> Removal of cells with nFeatures > 6000                                         | 20,422          | 72.22             |

**Step 1**  
Load pre-processed data into Seurat min.features = 100

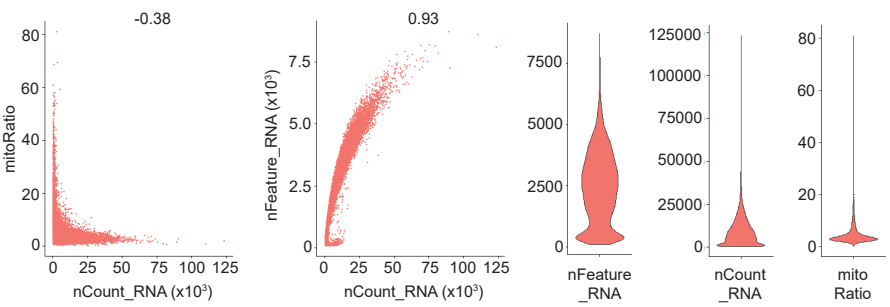

**Step 2**  
Removal of cells with nFeatures < 200

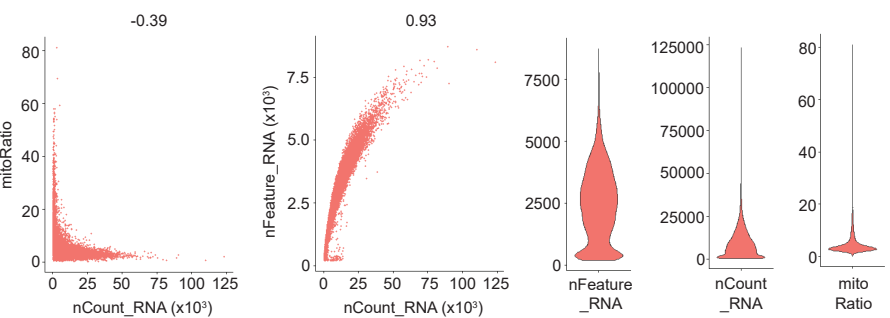

**Step 3**  
Removal of cells with over 5% of genes derived from mitochondria percent.mt > 0.05

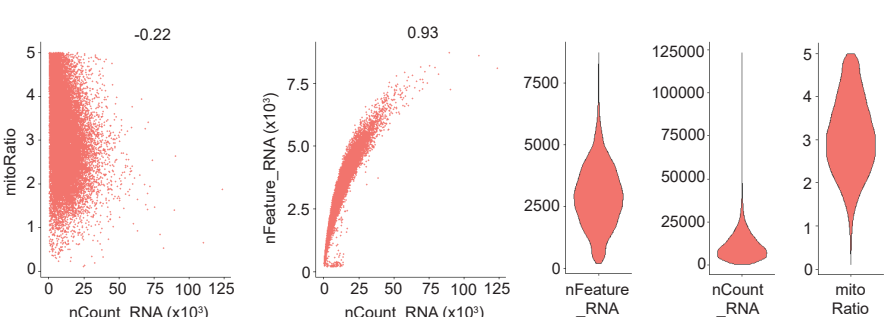

**Step 4**  
Removal of cells with nFeatures > 6000

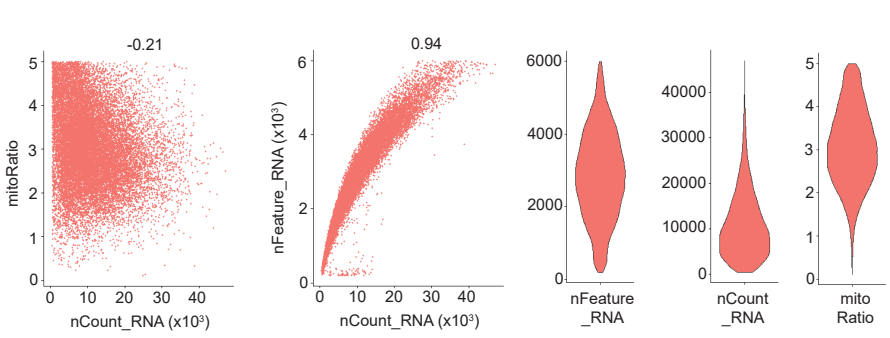

Supplement: NIHMS1870055-supplement-Supp4.pdf [file NIHMS1870055-supplement-Supp4.pdf]
