# Supplementary material
Source: PubMed Central journal article supplement (PMC9972892)

### A Conserved biological functions of fibroblast subsets

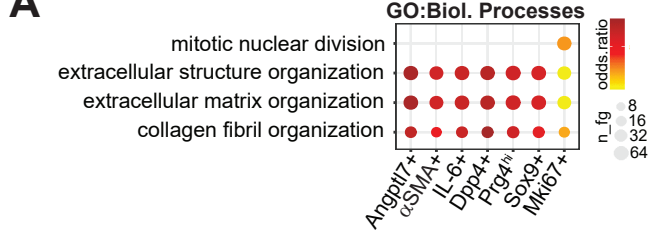

### B Unique biological functions of fibroblast subsets

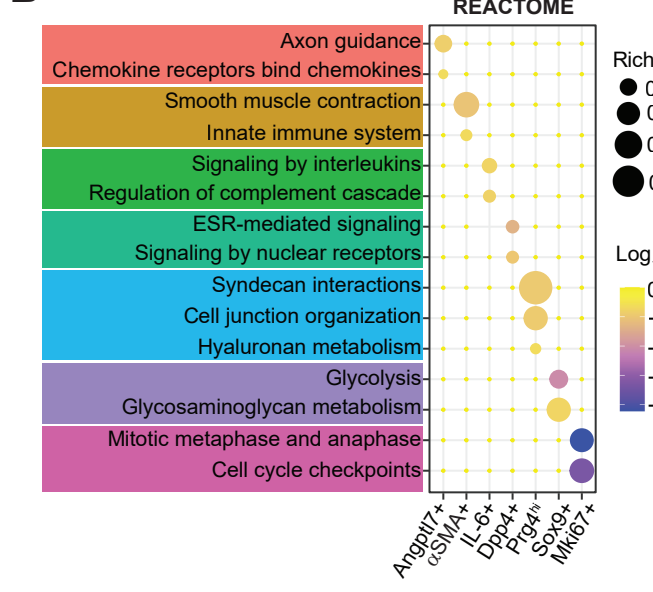

### C Outgoing signaling line plots

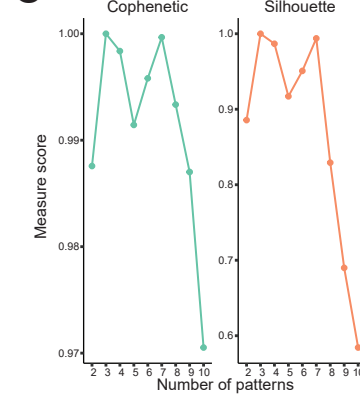

### E Outgoing communication patterns

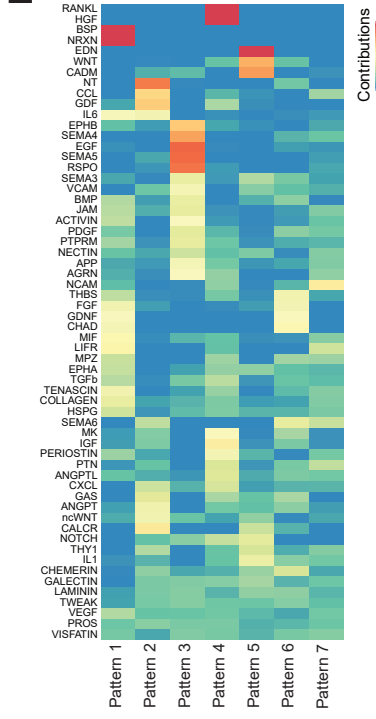

### D Outgoing cell patterns

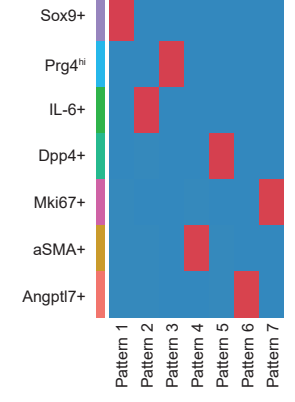

### F Incoming signaling line plots

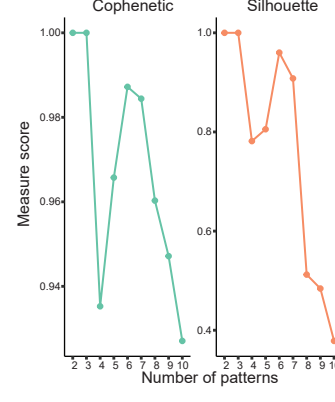

### H Incoming communication patterns

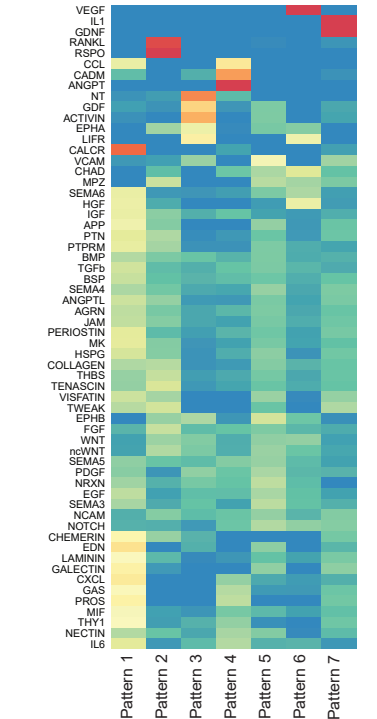

### G Incoming cell patterns

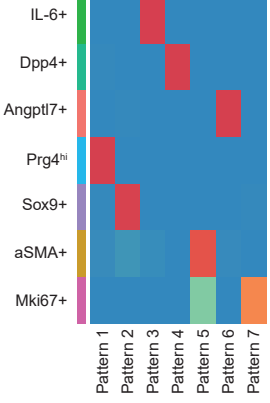

### I Incoming communication patterns of fibroblasts

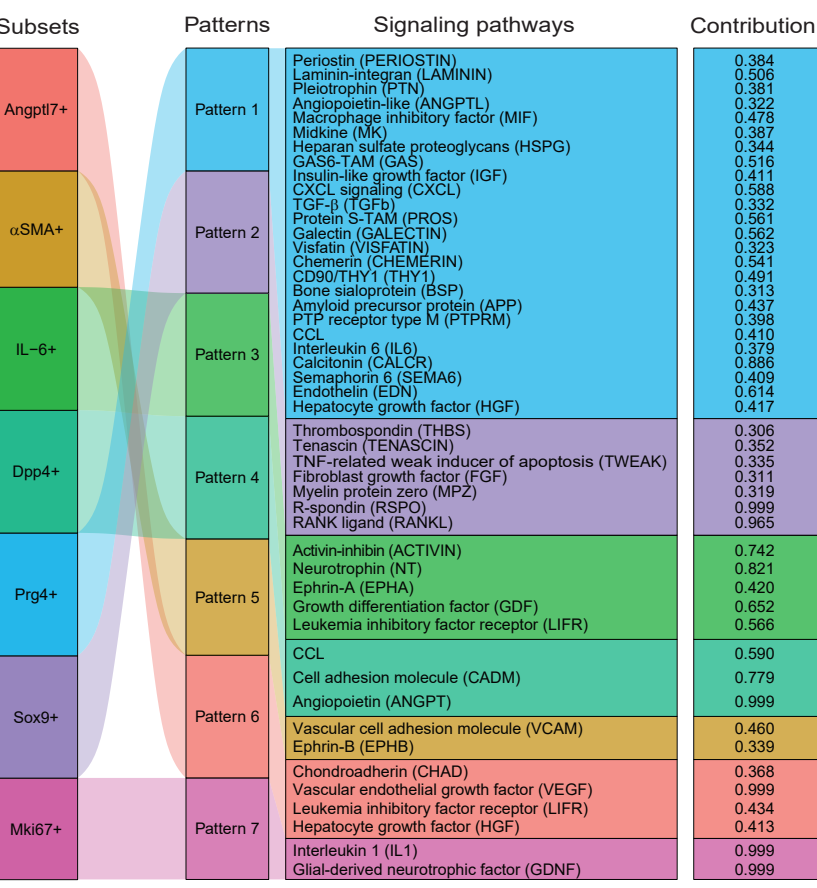

Supplement: NIHMS1870055-supplement-Supp8.pdf [file NIHMS1870055-supplement-Supp8.pdf]
