# Supplementary material
Source: PubMed Central journal article supplement (PMC9972892)

**A**

Mouse PTOA: this study

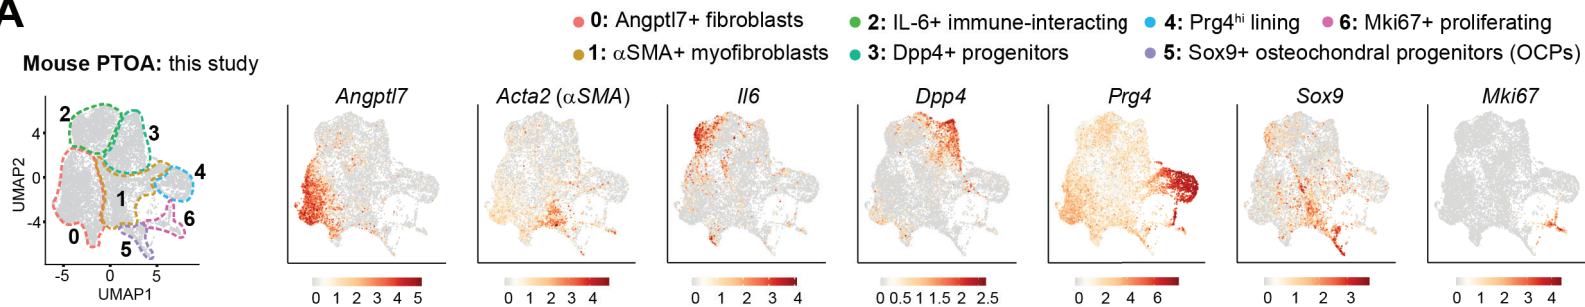**B**

Human RA: Zhang et al (2019) Nat Immunol 20(7): 928-942

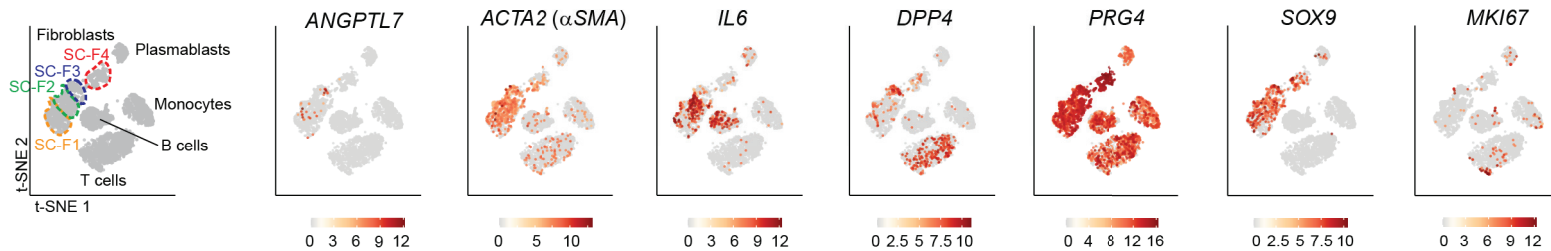**C**

Human OA (top) and RA (bottom): Wei et al (2020) Nature 582(7811): 259-264

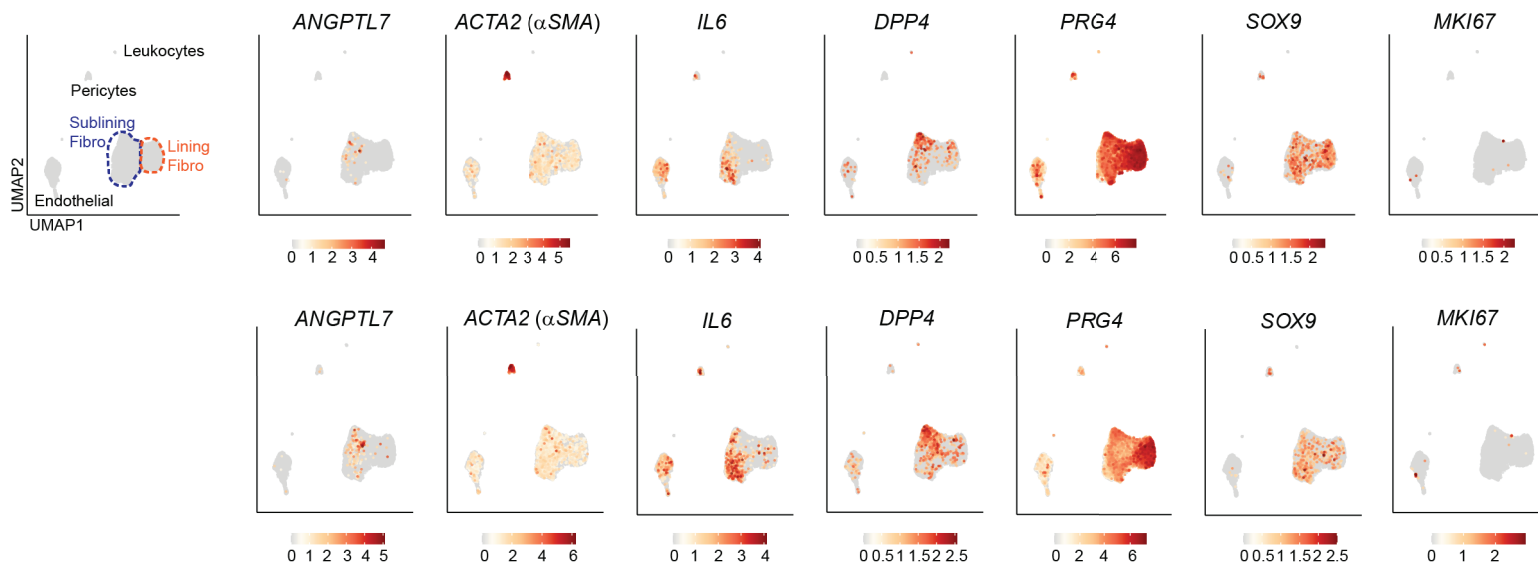

Supplement: NIHMS1870055-supplement-Supp9.pdf [file NIHMS1870055-supplement-Supp9.pdf]
