# Supplementary material
Source: PubMed Central journal article supplement (PMC9972892)

# Synovium

**A**
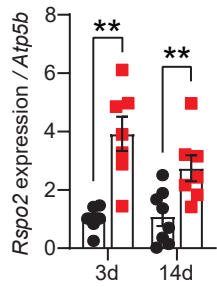
**B**
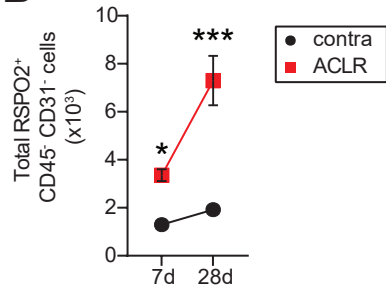
**C**
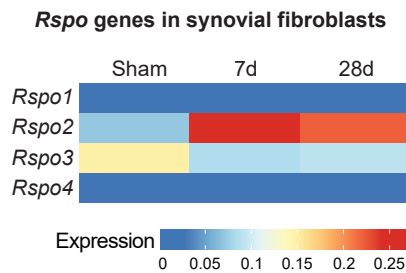
**D**

## Synovial fibroblasts

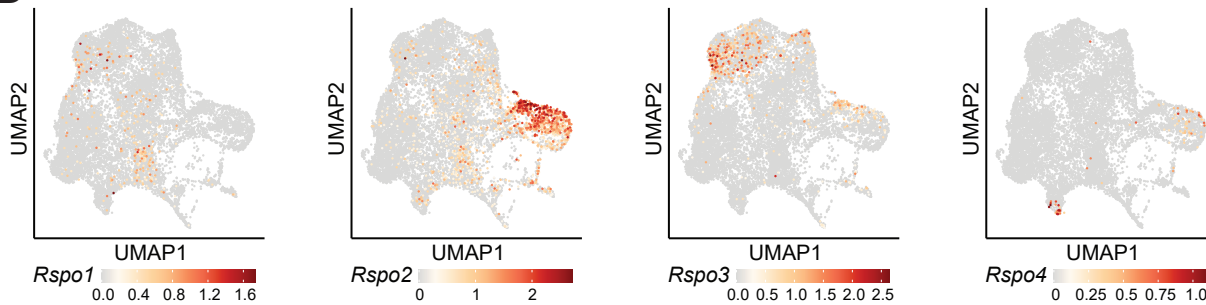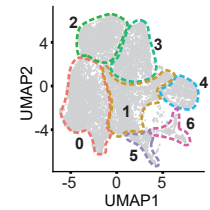

- 0: Angpt17<sup>+</sup> fibroblasts
- 1:  $\alpha$ SMA<sup>+</sup> myofibroblasts
- 2: IL-6<sup>+</sup> immune-interacting
- 3: Dpp4<sup>+</sup> progenitors
- 4: Prg4<sup>hi</sup> lining
- 5: Sox9<sup>+</sup> OCPs
- 6: Mki67<sup>+</sup> proliferating

## Primary cultured cells (knee-derived SFs)

**E**
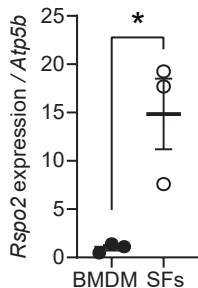
**F**
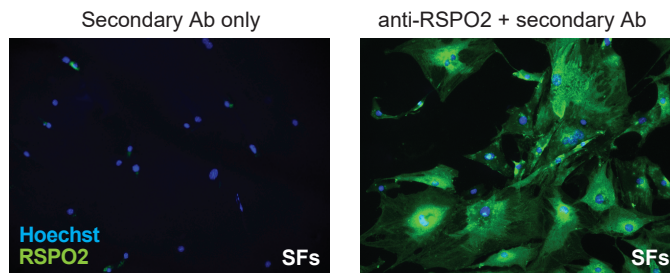
**G**

## Hindpaw SFs, passage 2

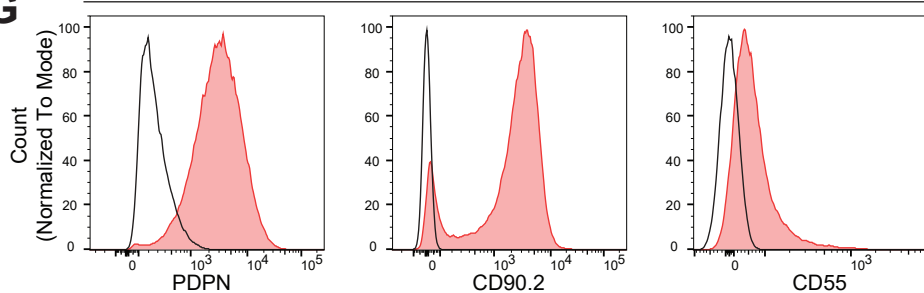
**H**
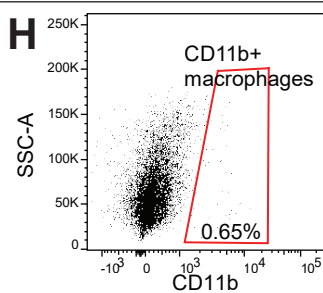
**I**

## Hindpaw SFs, passage 4

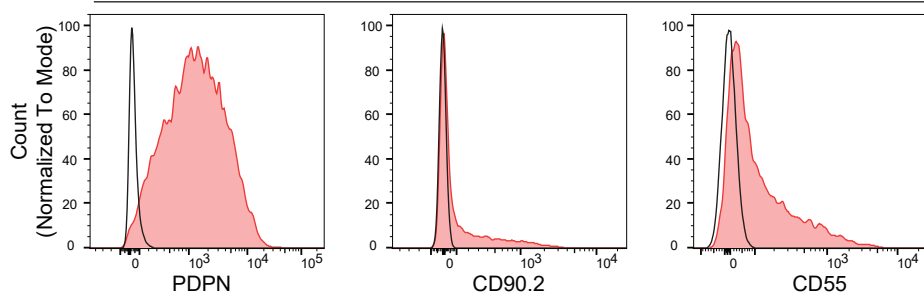
**J**
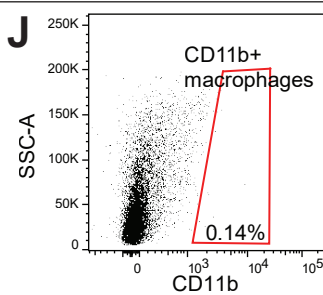

Supplement: NIHMS1870055-supplement-Supp12.pdf [file NIHMS1870055-supplement-Supp12.pdf]
