# Supplementary material
Source: PubMed Central journal article supplement (PMC9972892)

SF conditioned media onto ATDC5

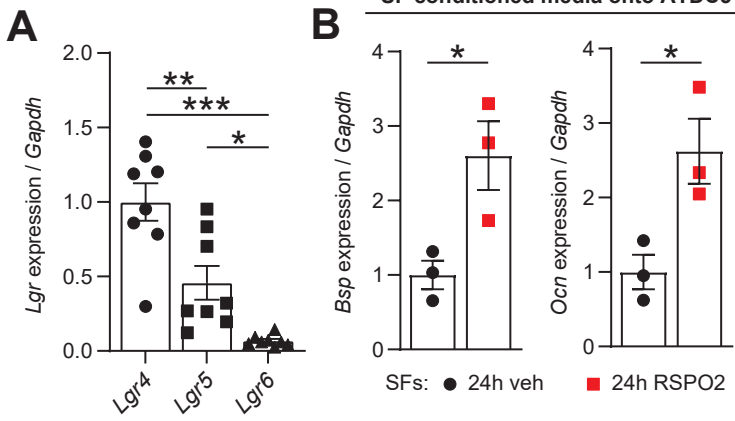

**C**    ● 21d + veh    ■ 21d + RSPO2    21d chondrogenic differentiation +/- RSPO2

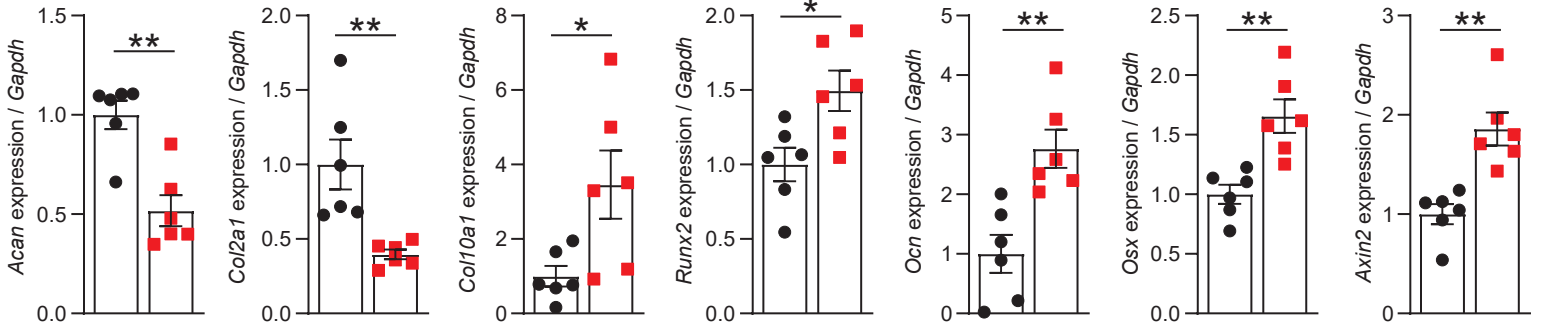

**D**    ● 24h veh    ■ 24h RSPO2    24h +/- RSPO2

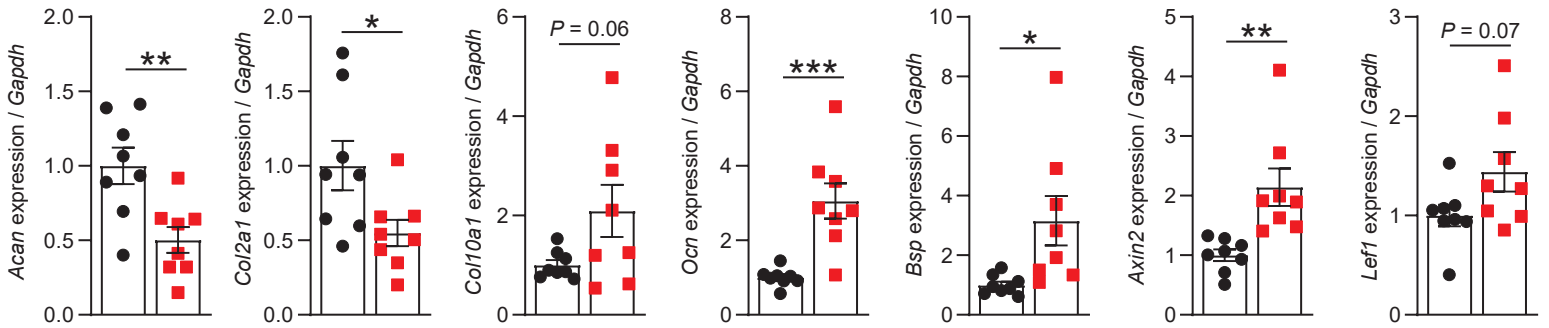

Supplement: NIHMS1870055-supplement-Supp17.pdf [file NIHMS1870055-supplement-Supp17.pdf]
