# Supplementary material
Source: PubMed Central journal article supplement (PMC9972892)

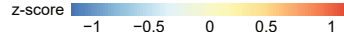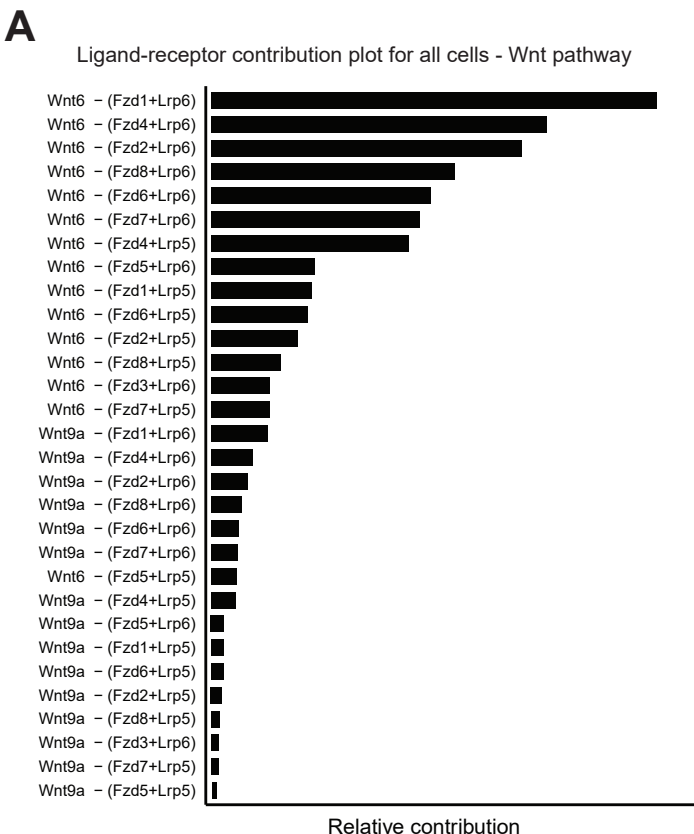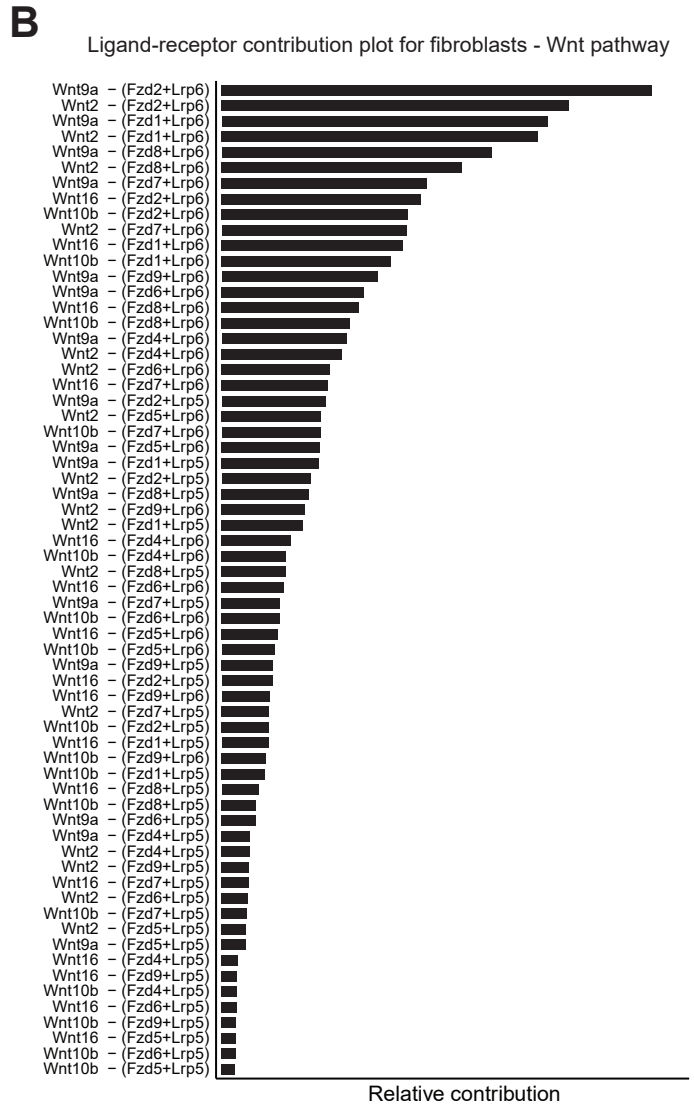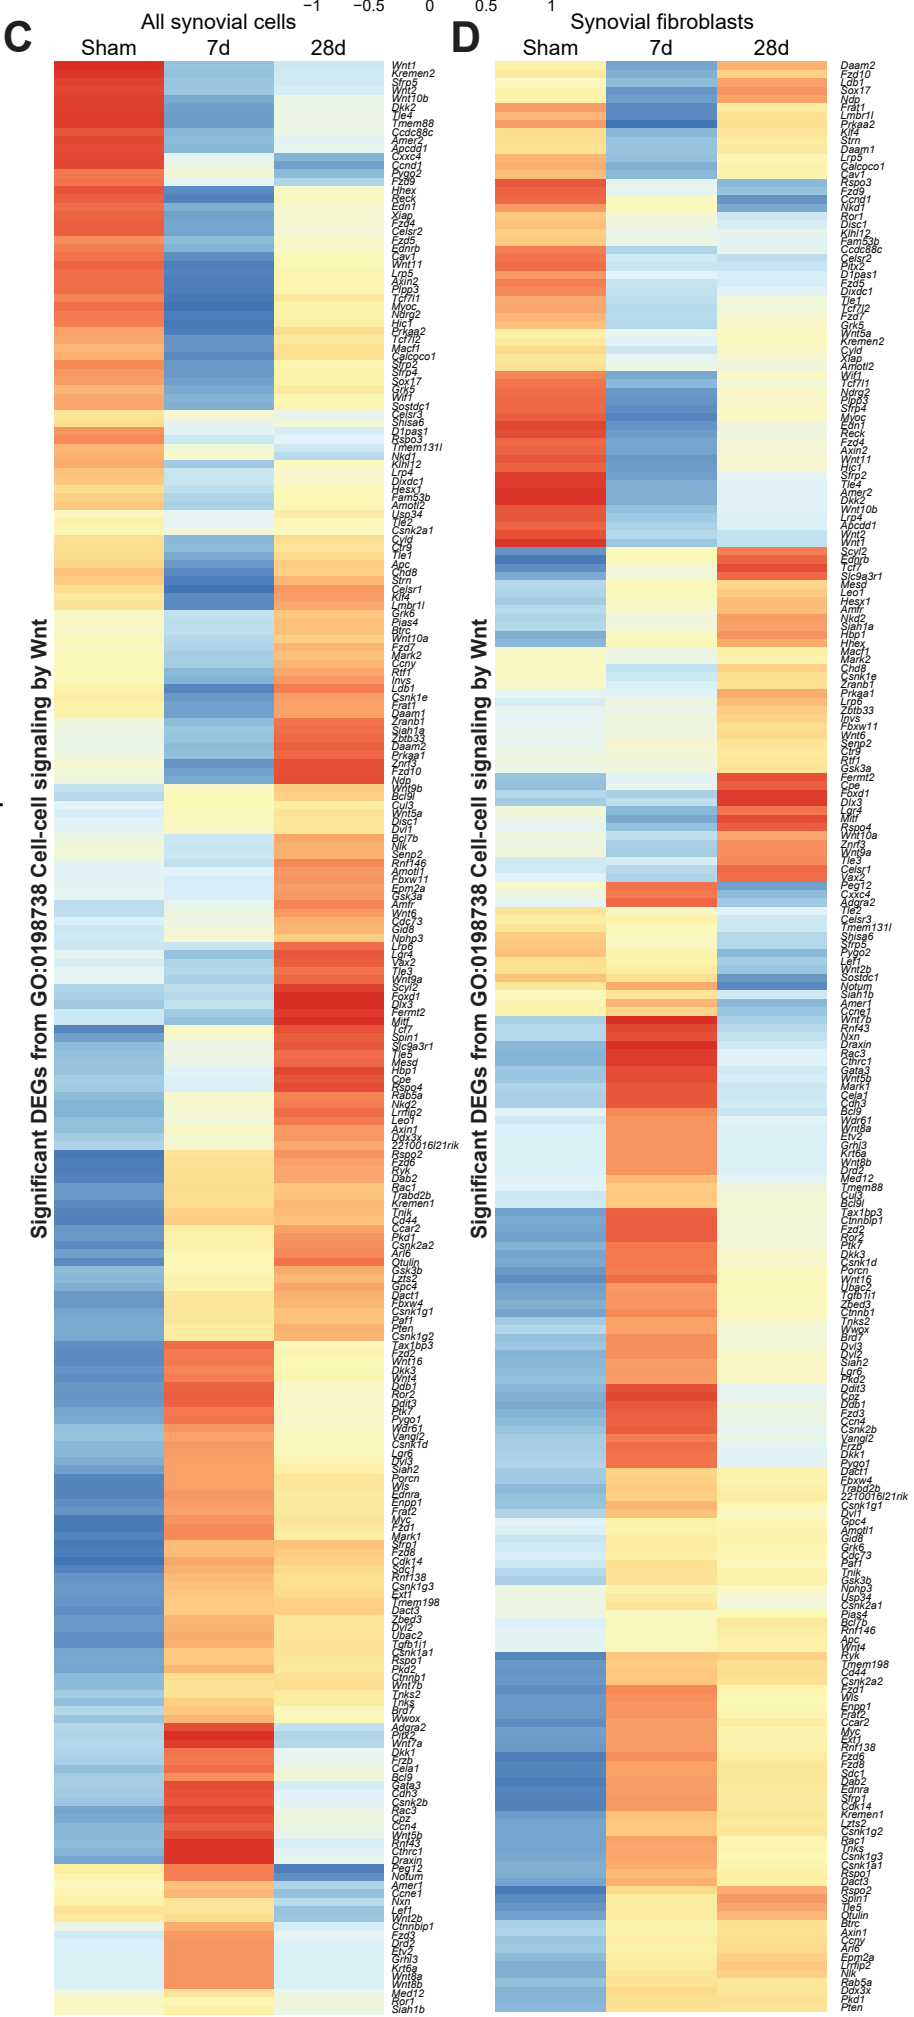

Supplement: NIHMS1870055-supplement-Supp10.pdf [file NIHMS1870055-supplement-Supp10.pdf]

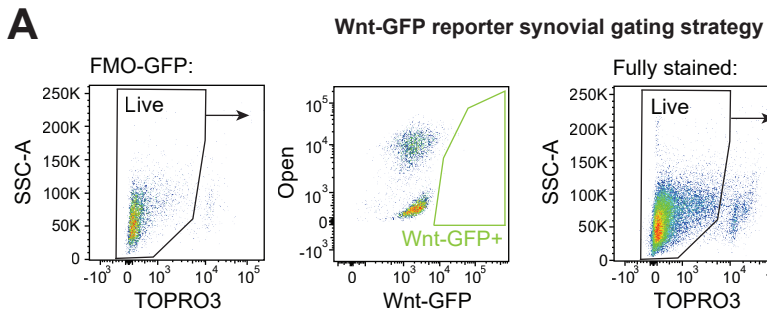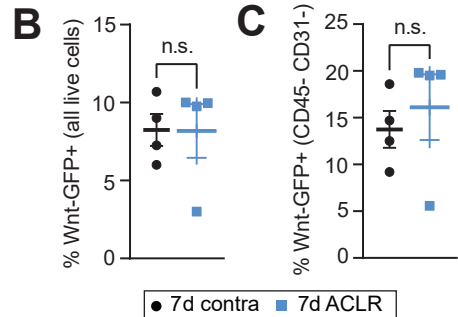

Supplement: NIHMS1870055-supplement-Supp11.pdf [file NIHMS1870055-supplement-Supp11.pdf]

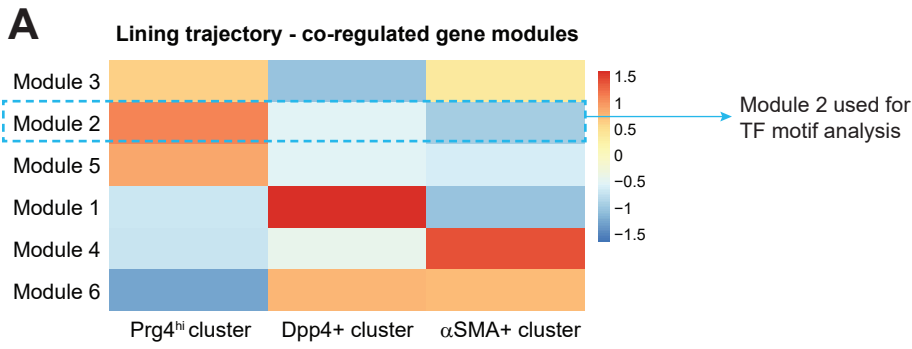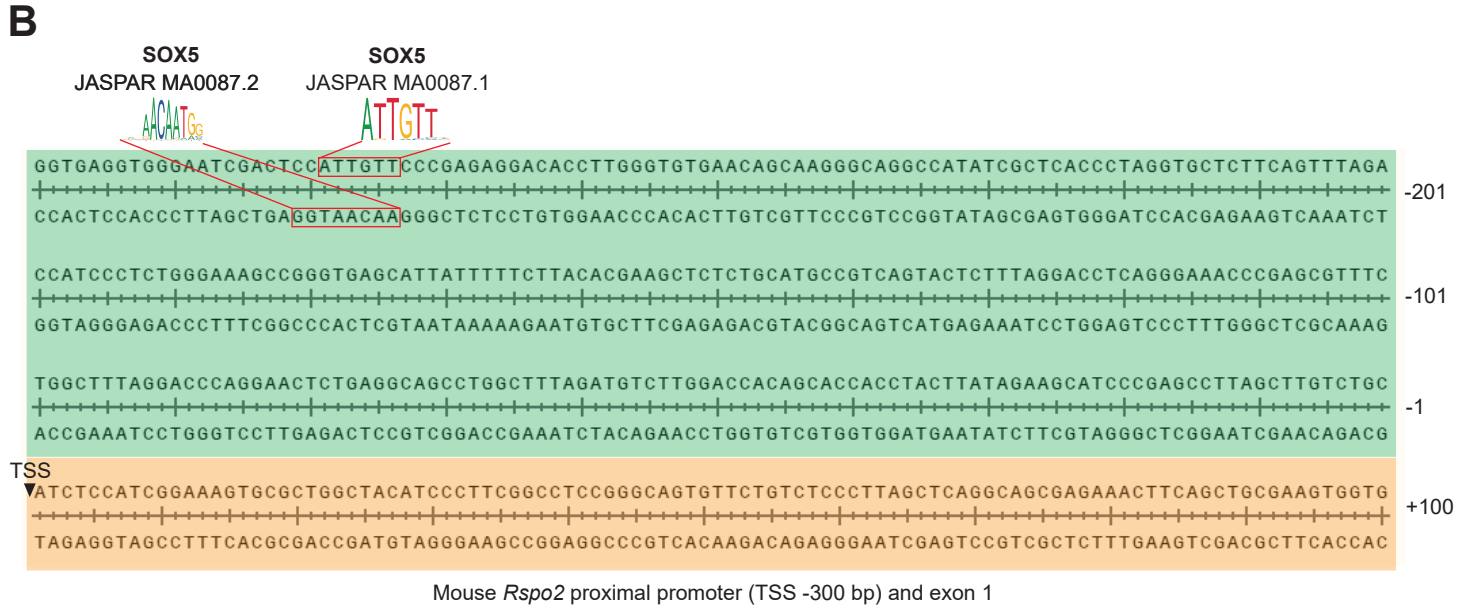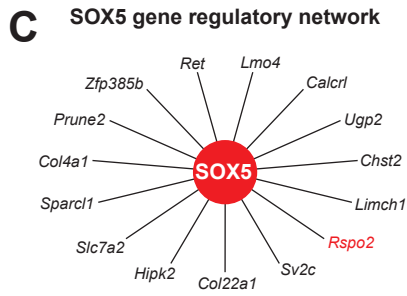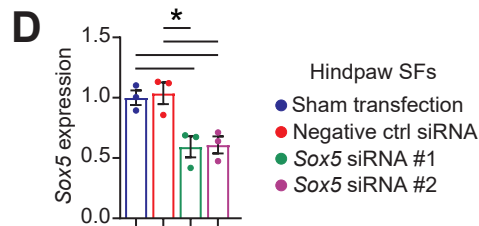

Supplement: NIHMS1870055-supplement-Supp13.pdf [file NIHMS1870055-supplement-Supp13.pdf]

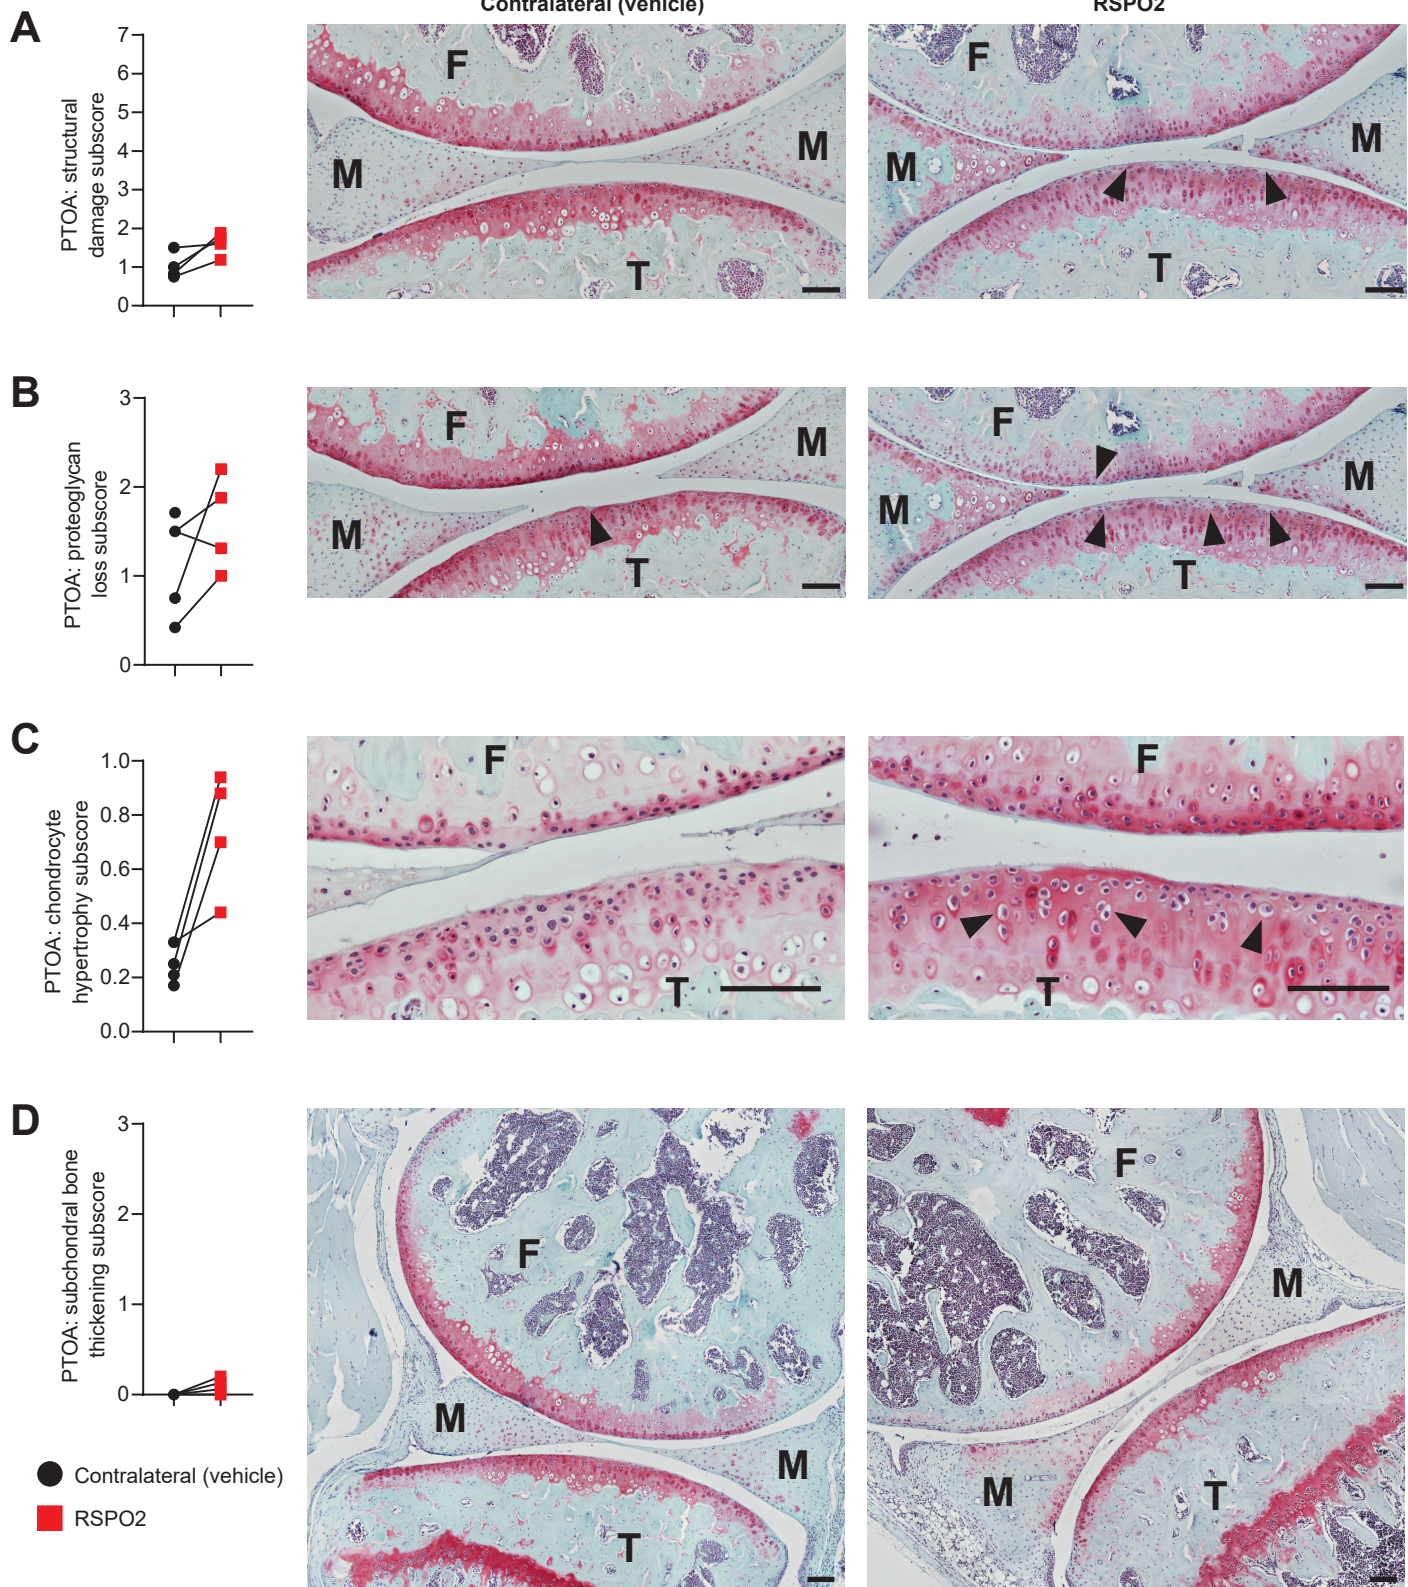

Supplement: NIHMS1870055-supplement-Supp14.pdf [file NIHMS1870055-supplement-Supp14.pdf]

**A**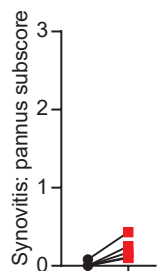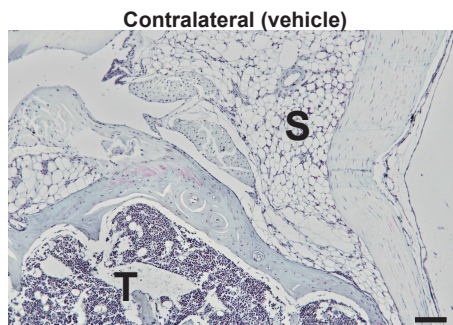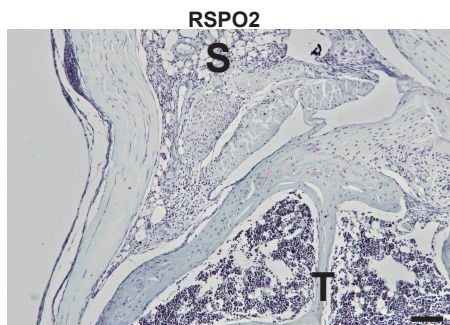**B**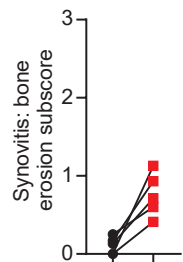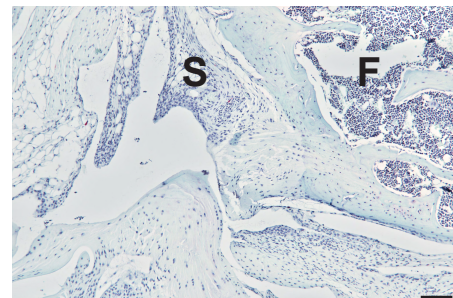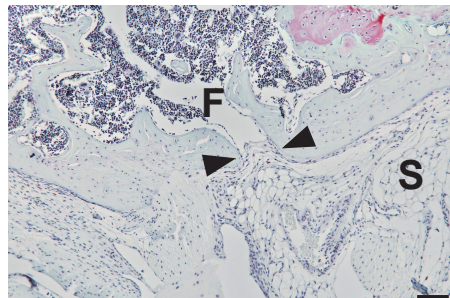**C**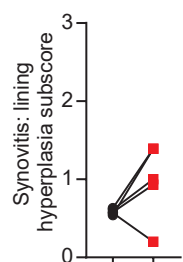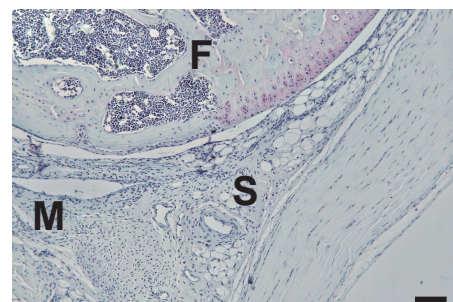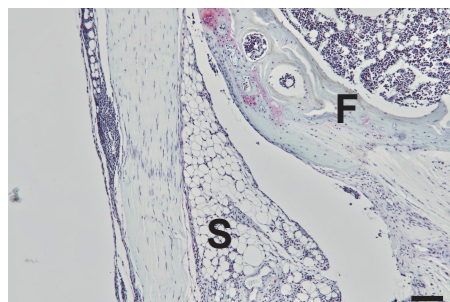**D**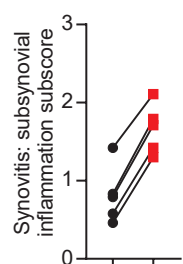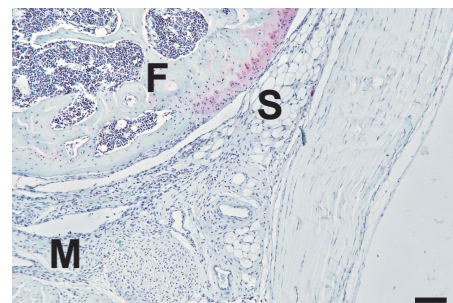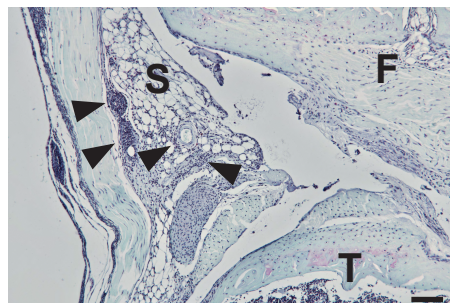**E**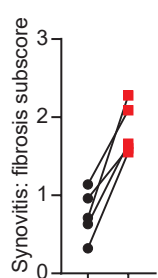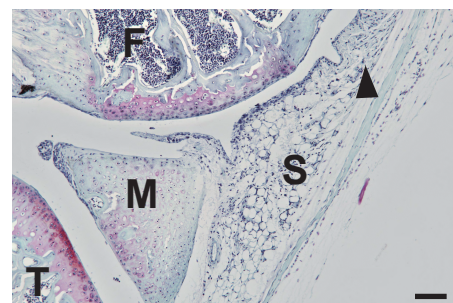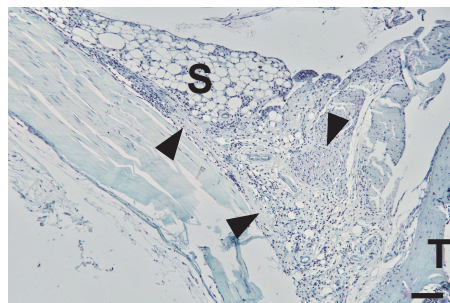**F**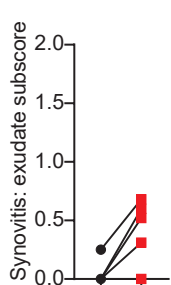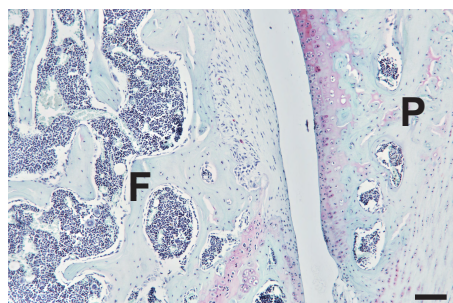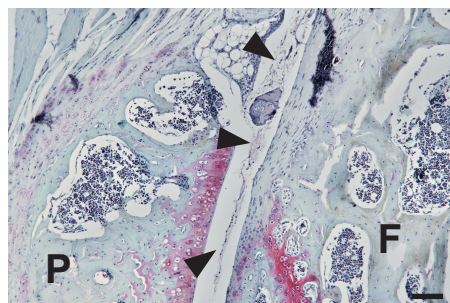

● Contralateral (vehicle)

■ RSPO2

Supplement: NIHMS1870055-supplement-Supp15.pdf [file NIHMS1870055-supplement-Supp15.pdf]

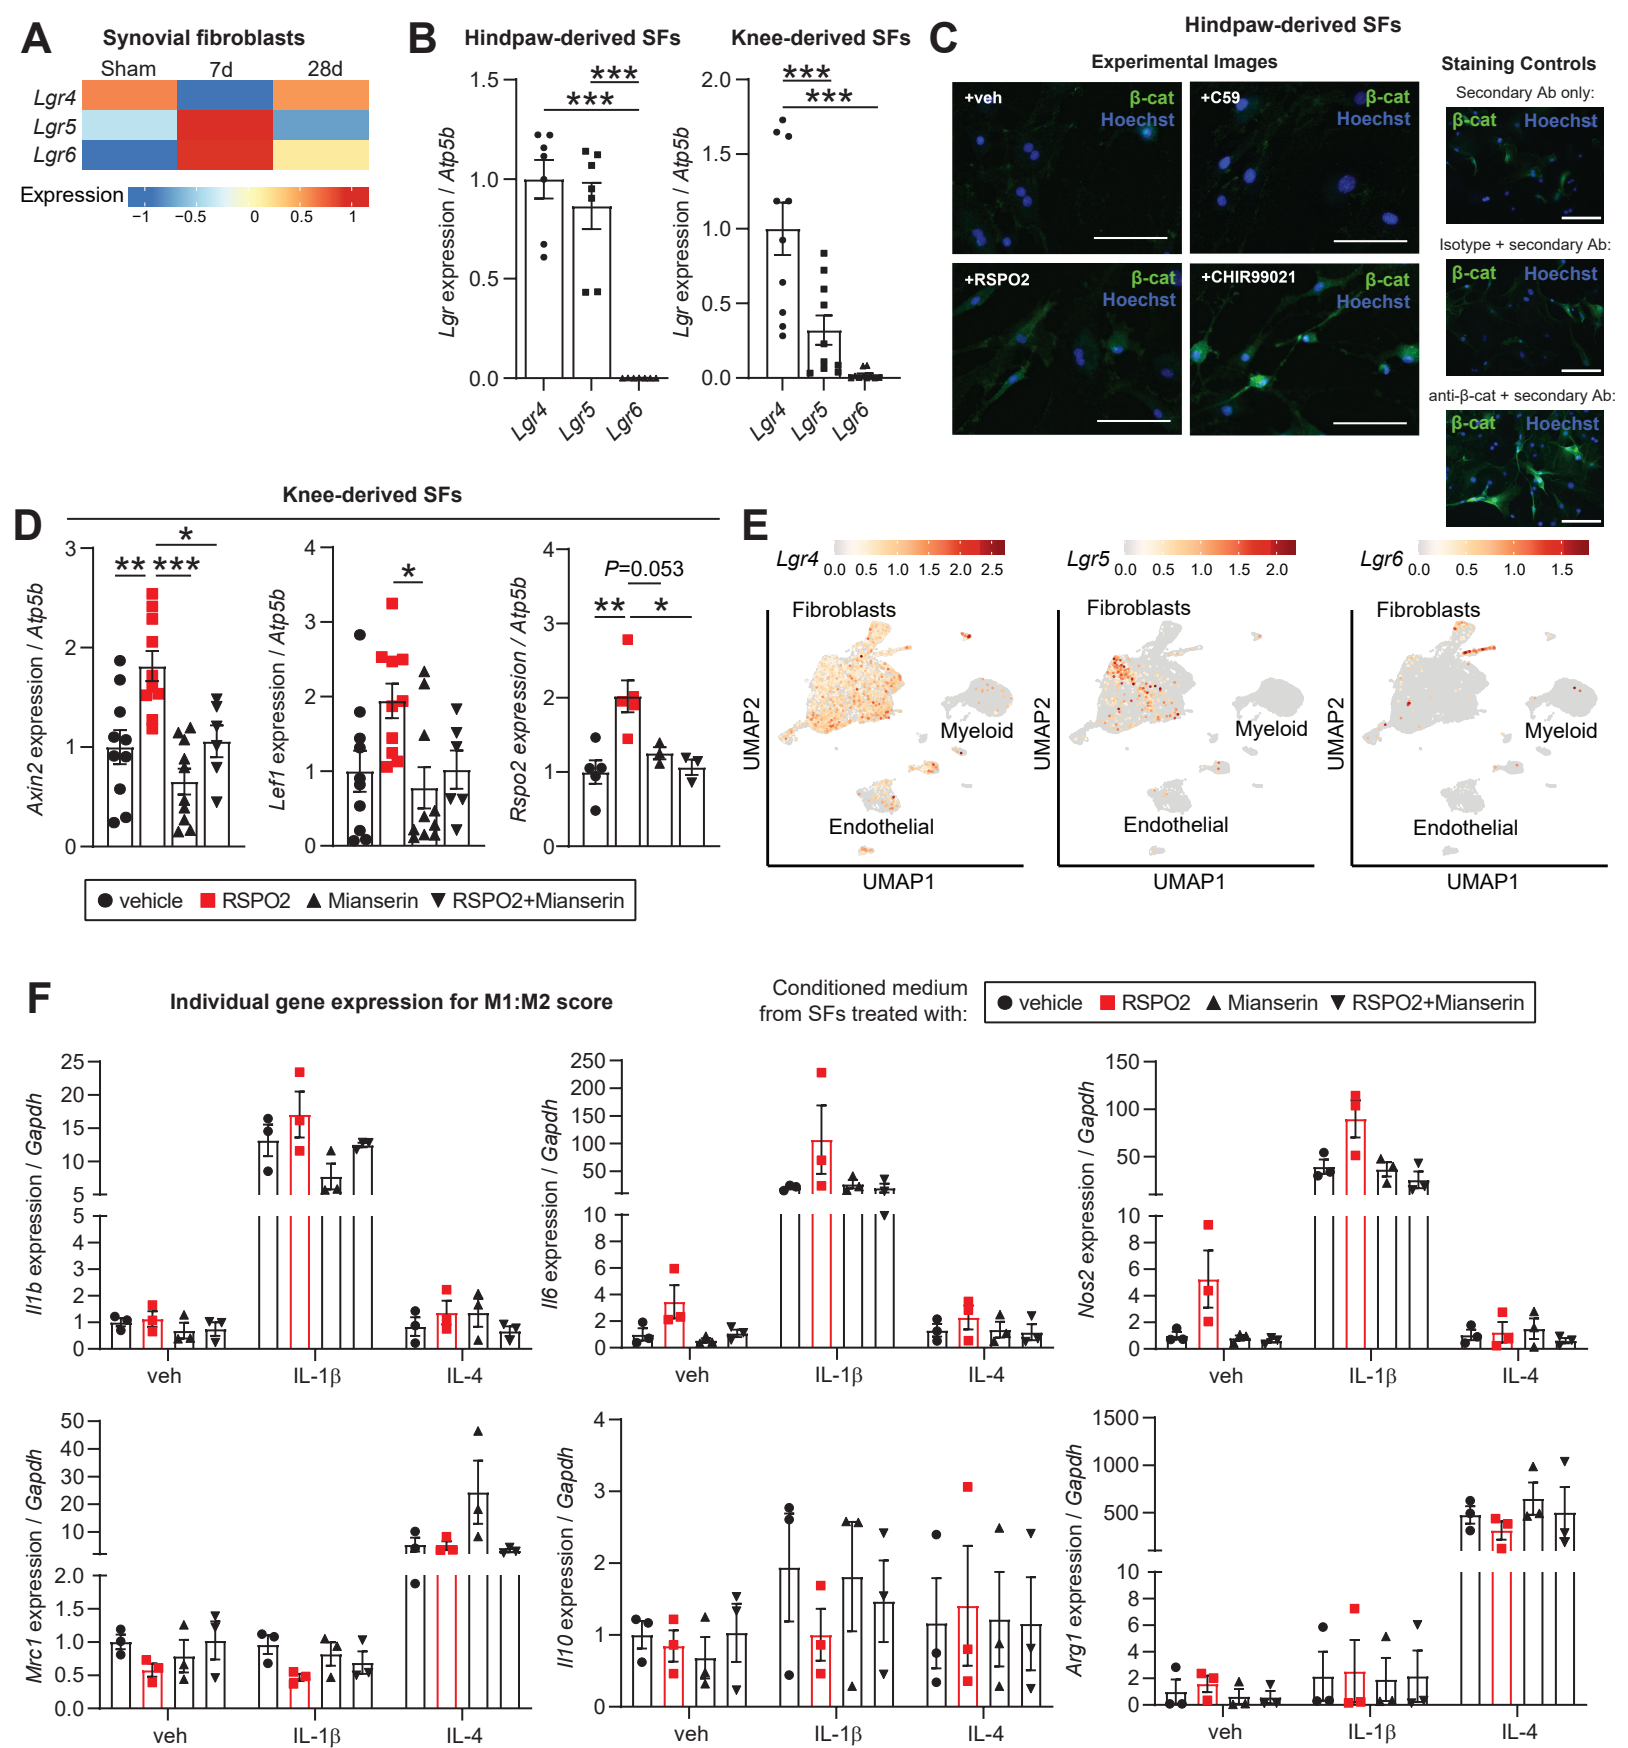

Supplement: NIHMS1870055-supplement-Supp16.pdf [file NIHMS1870055-supplement-Supp16.pdf]

All synovial cells: top 5 genes per cluster

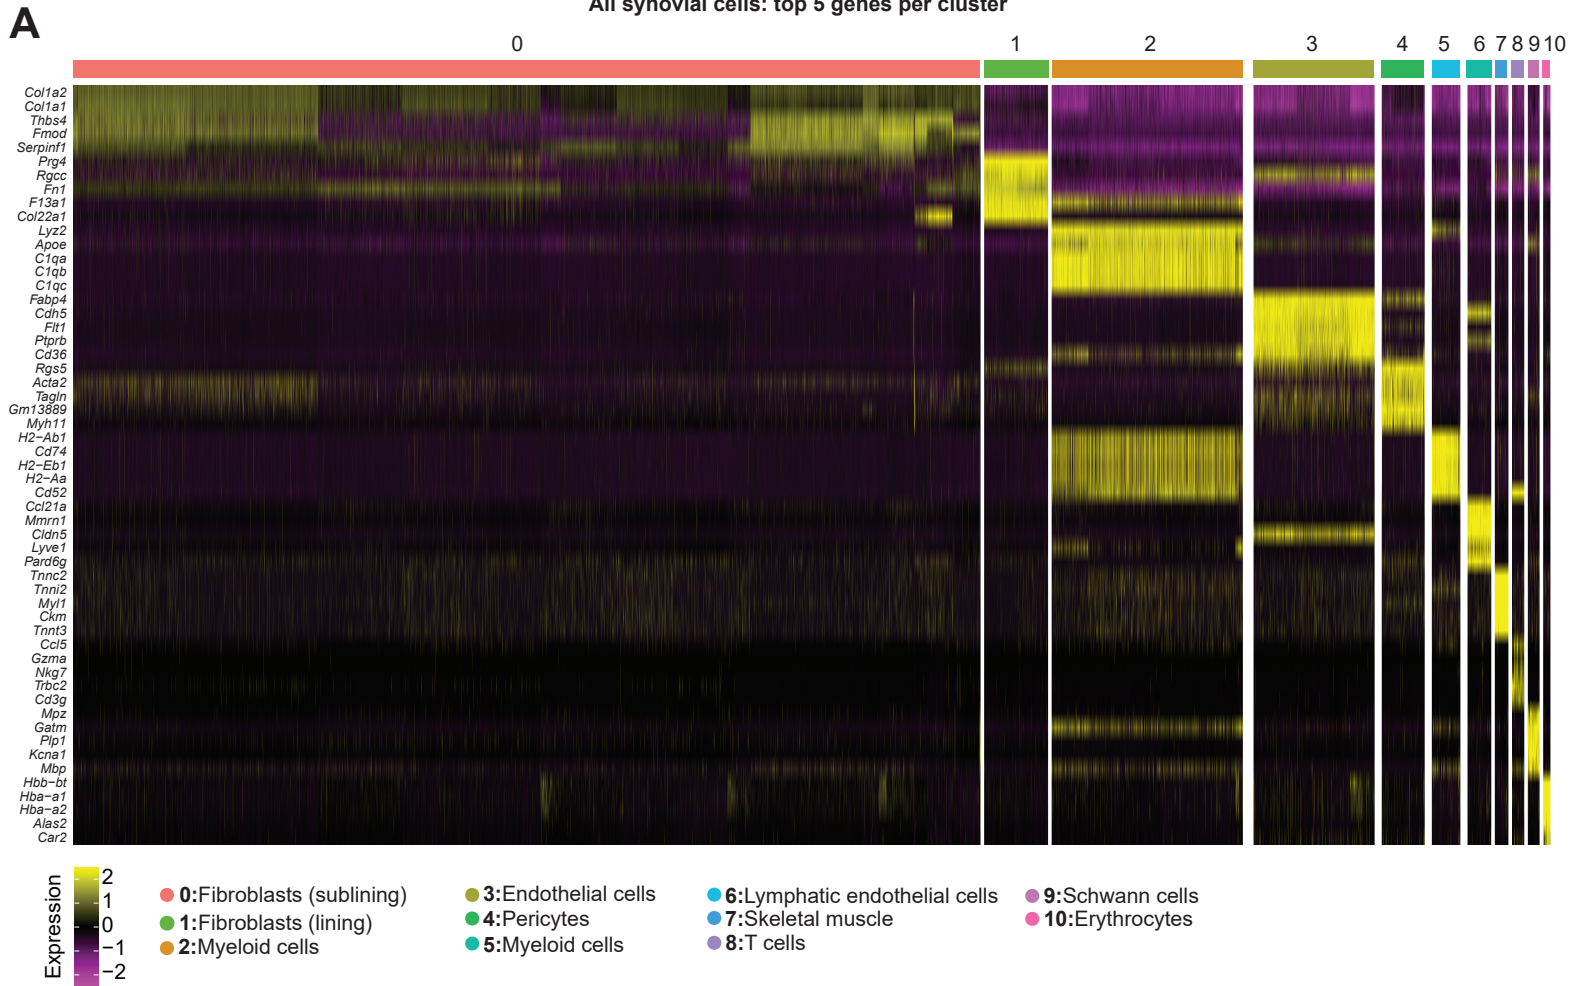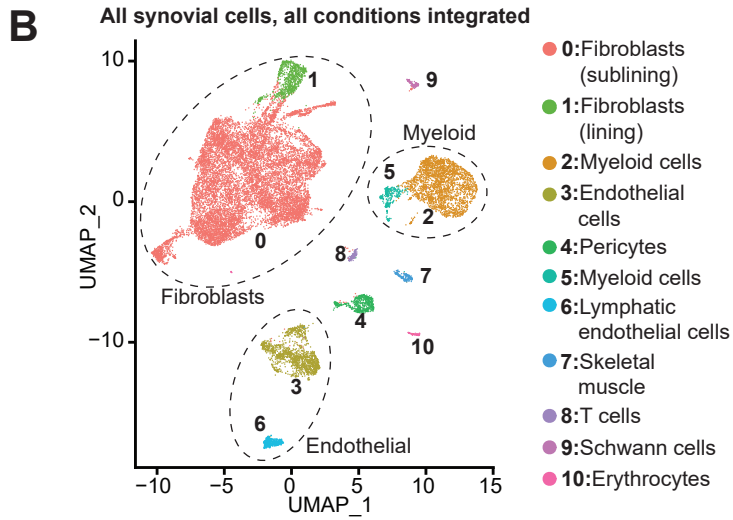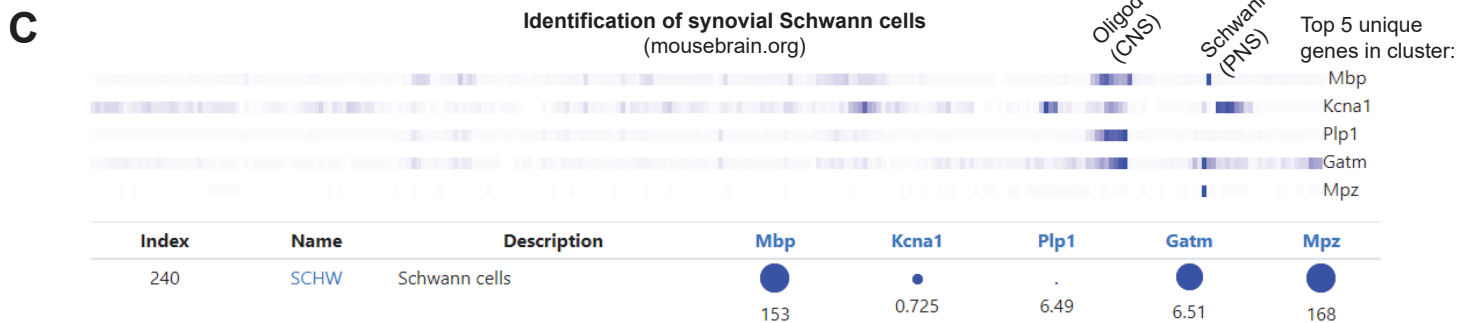

Supplement: NIHMS1870055-supplement-Supp5.pdf [file NIHMS1870055-supplement-Supp5.pdf]

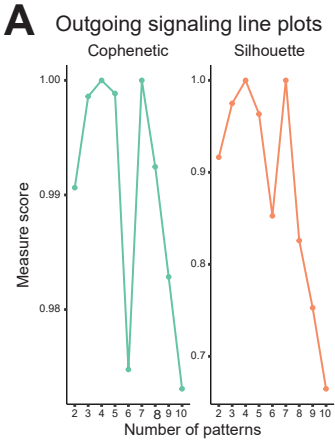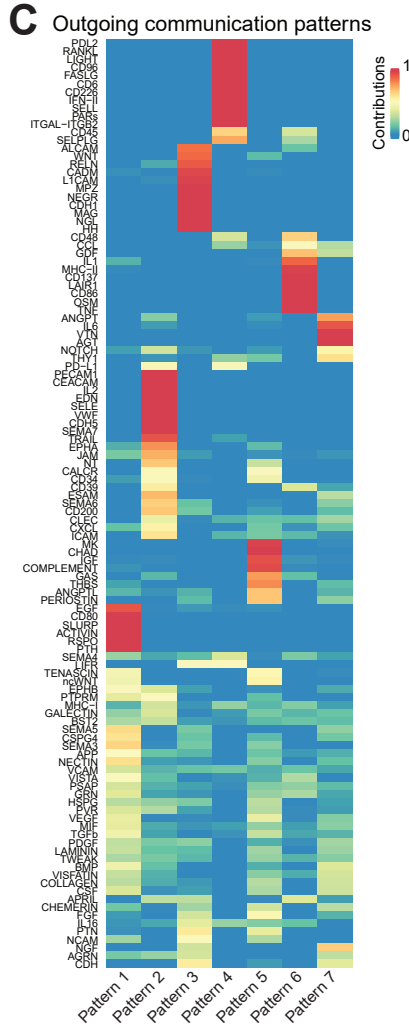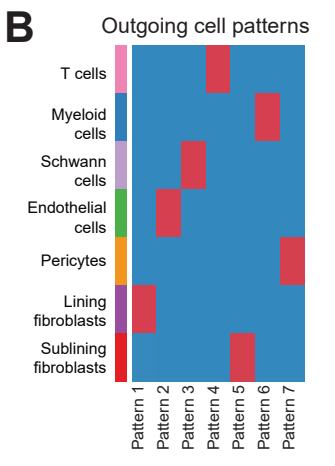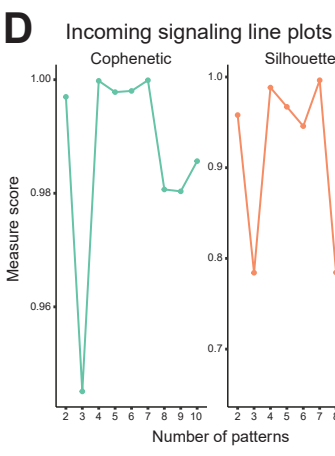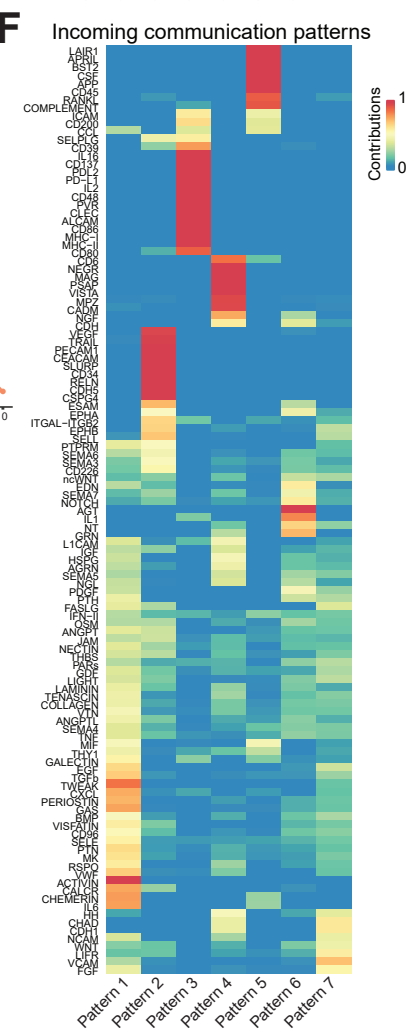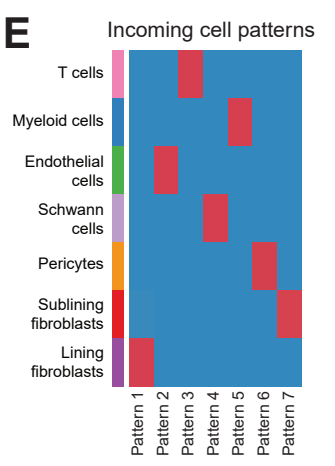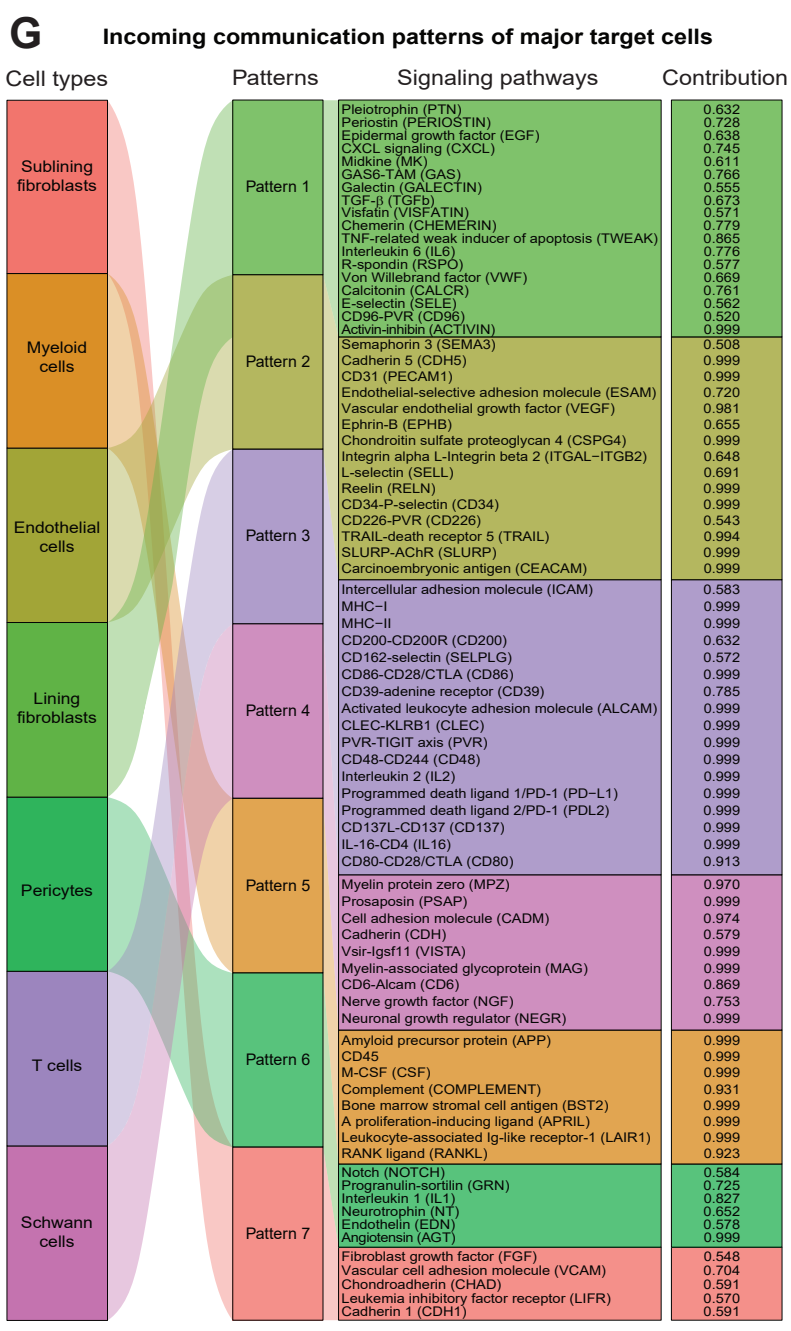

Supplement: NIHMS1870055-supplement-Supp6.pdf [file NIHMS1870055-supplement-Supp6.pdf]

Synovial fibroblasts: top 5 genes per cluster

**A**

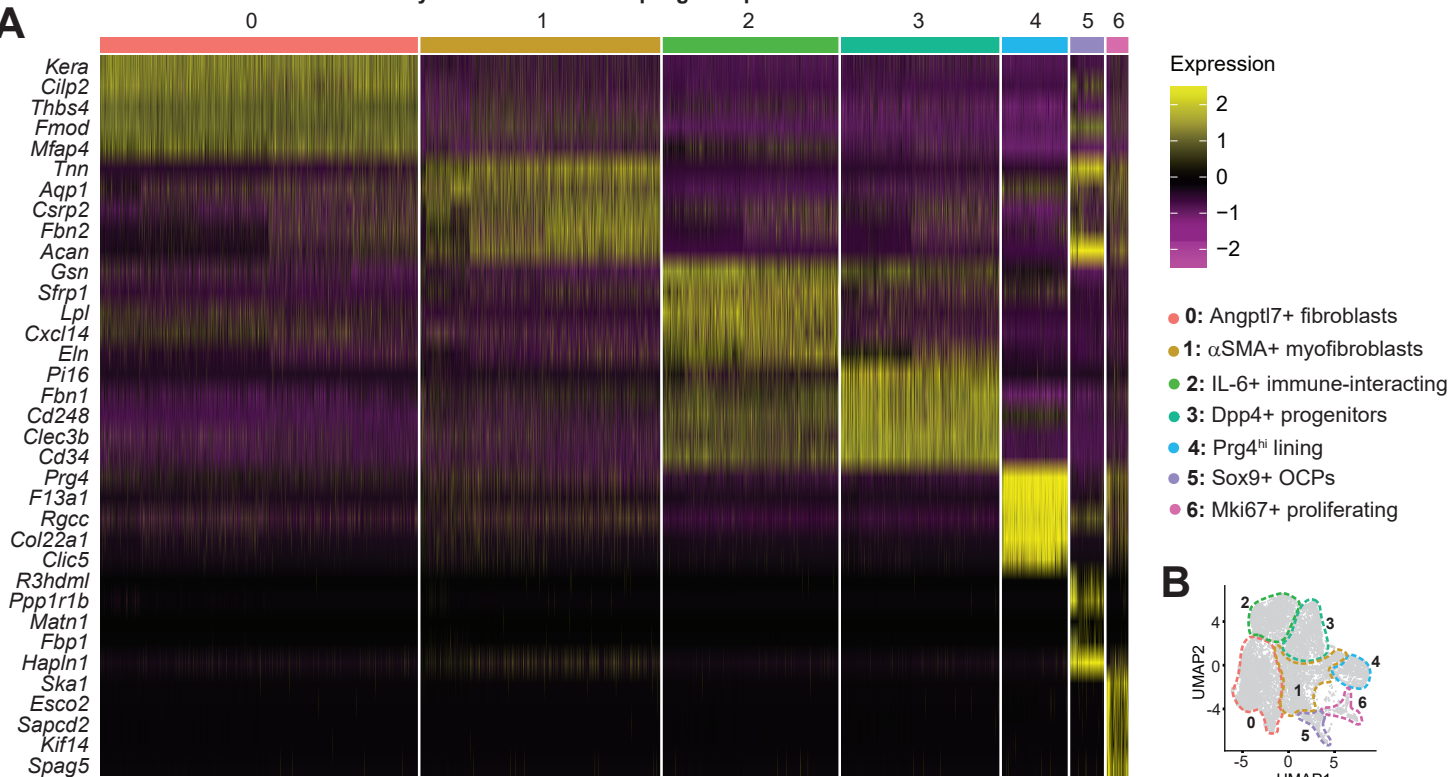

**B**

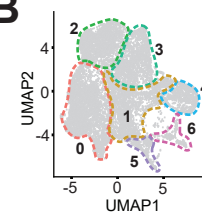

**C**

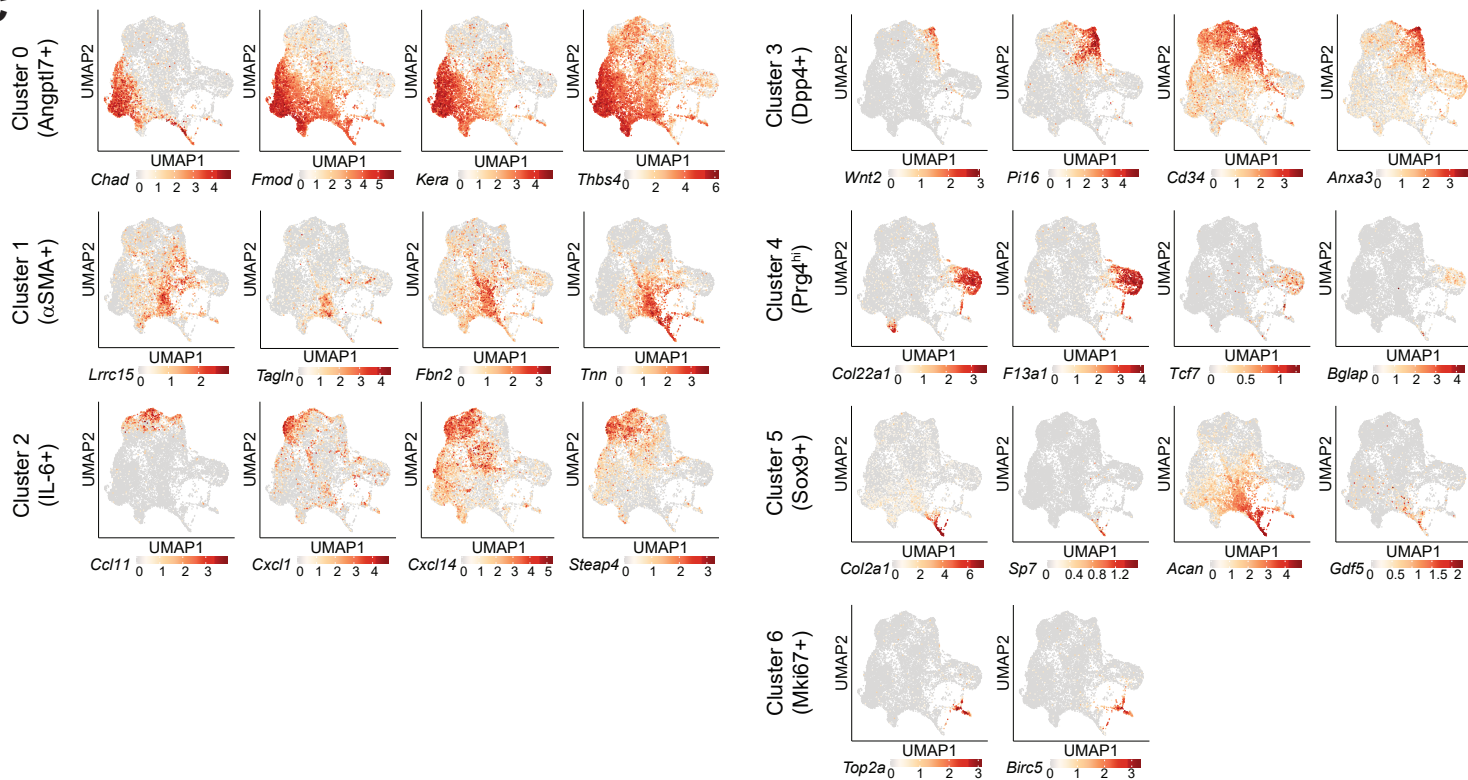

Supplement: NIHMS1870055-supplement-Supp7.pdf [file NIHMS1870055-supplement-Supp7.pdf]
